# Supplementary material
Source: PubMed Central journal article supplement (PMC2707879)
Supplement: NIHMS94389-supplement-proteome_data.pdf [file NIHMS94389-supplement-proteome_data.pdf]

**Electronic Supplemental Material for Bosch, Skovran *et al.***

Contents:

Instructions for accessing Summary Data Tables S1, S2 and S4 ..... S-2

Notes and explanatory material for Tables S1, S2 and S3 ..... S-3

Supplemental Summary Data Table S3 ..... S-8

Notes for supplemental Figures SF1-SF4 ..... S-20

Supplemental Figures SF1-SF4 ..... S-21

Misc. R source code and notes regarding data normalization procedures ..... S-25

### Instructions for accessing the Supplemental Data Tables and *DTASelect* filter files

Table S3, the results for ORFs associated with methanol and succinate metabolism, is contained below in this PDF document. Tables S1 and S2 were too large for the journal web server at the time of submission and are thus available on Dr. Hackett's data server at the UW College of Engineering Center for Microbial Proteomics. Table S4, the RMQ number conversion table between the 2002 RMQ numbers and the revision issued in 2007, can also be found at the same URL. For purposes of comparing the microarray results published originally by Okubo, Skovran *et al.* (2007) *Omic*s 11, 325-340 and also reproduced in Tables S1-S3, it is not necessary to use the conversion table because both the array results and the proteomics are based on the 2002 RMQ numbers given in the tables. An RMQ number designates an ORF in the annotated genome. A new and complete genome annotation for *Methylobacterium extorquens* AM1 will be publicly released in latter 2008. At the time of release a new conversion table will be posted to allow the use of the present data tables with the new annotation. As genome annotation is always to some degree a work in progress, scientists interested in the latest information regarding AM1 should also consult links from the Lidstrom Lab website at the second URL given below. Reviewers and other parties interested in viewing the PDF summary tables for all 7,556 RMQ numbers, the *DTASelect* filter files and Table S4 should login at the following URL:

<http://depts.washington.edu/mhlab/>

login name: guest

password: AM1DATA

Please note that the password is case sensitive. Parties with a desire to download the entire *Methylobacterium extorquens* AM1 FileMaker Pro database, on which the PDFs are based, should contact the corresponding author at [mhackett@u.washington.edu](mailto:mhackett@u.washington.edu) or Dr. Mary Lidstrom at [lidstrom@u.washington.edu](mailto:lidstrom@u.washington.edu). The original *DTASelect* filter files for all AM1 proteomics data reported in this paper are also available at this URL. The Lidstrom Lab website can be found at <http://depts.washington.edu/mlab/>. No established public proteomic data archive at the time of submission was able to easily accommodate the scale of the raw mass spectrometry data acquired for this study. Thus, the raw data will be maintained on the corresponding author's server until such time as the mechanics of archival storage can be arranged.

### Notes for Supplemental Tables S1-S3

The ORF numbers (RMQ numbers) and functional descriptors are primarily those derived from Okubo, Skovran *et al.* (2007) *Omic* 11, 325-340, with some changes and corrections. Table S1 lists all annotated ORFs by RMQ number in ascending order, including RMQ numbers for which there is no data. This table was derived from a much larger relational database of *Methylobacterium extorquens* AM1 proteomics and genomics data implemented in FileMaker Pro at the University of Washington by Dr. Fred Taub, [fredtaub@u.washington.edu](mailto:fredtaub@u.washington.edu). An explanation is given below for each field in the table.

**RMQ:** these are the 2002 ORF numbers used in the previously published array paper cited above. A cross-reference to the RMQ numbers assigned in 2007 can be found in Table S4.

### Protein Spectral Count fields

**q-value:** this is a measure of false discovery rate that is discussed in the main text. In this study any *q*-value less than 0.01 was judged to be significant. Similarly to a *p*-value, the *q*-value is influenced by both the magnitude of the abundance change and the variance, but it is a measure of significance in terms of false discovery rate rather than false positive rate. It implicitly contains a correction for multiple hypothesis testing. See Storey and Tibshirani (2003) *PNAS* 100, 9440-9445 for a complete description of the *q*-value. As described in the main text, the spectral count *q*-value was derived from the uncorrected *p*-value associated with a *G*-test as described for proteomics data in Xia *et al.* (2007) *Inter. Jour. Mass Spectrom.* 259, 105-116. The key difference in detail in this work is that the actual value of *G* was calculated globally as  $G_{Total}$  according to the method described in Sokal and Rohlf, *Biometry*, 3<sup>rd</sup> Ed. (1995), which takes advantage of the additivity of *G* for each individual comparison, i.e.  $G_{Total} = G(MeOH\_1, Succin\_1) + G(MeOH\_1, Succin\_2) + G(MeOH\_2, Succin\_1) + G(MeOH\_2, Succin\_2)$  with 2 to 4 degrees of freedom, depending on missing values for certain ORFs. Each individual value of *G* was calculated as given below:

$$G = 2 \left[ f_{Succin} \cdot \ln \left( \frac{f_{Succin}}{\frac{f_{Succin} + f_{MeOH}}{2}} \right) + f_{MeOH} \cdot \ln \left( \frac{f_{MeOH}}{\frac{f_{Succin} + f_{MeOH}}{2}} \right) \right]$$

Where the expectation value of equal spectral counts for *MeOH* and *Succin* assumes a null hypothesis of zero abundance change between methanol and succinate nutrient conditions:

$$\hat{f}_{MeOH} = \hat{f}_{Succin} = \frac{f_{MeOH} + f_{Succin}}{2}$$

The value of  $G_{Total}$  was then compared using R to the value of Chi-square at the appropriate degrees of freedom to derive the  $p$ -value, which in turn served as the input into the QVALUE R package, see <http://faculty.washington.edu/jstorey/qvalue/>. The correction for multiple hypothesis testing contained in the  $q$ -value is significantly less conservative in practice than other, more common corrections to the  $p$ -value, such as the Bonferroni method. This is a good thing for the work reported here, because the combination of spectral counting and the  $G$ -test as presented in Xia *et al.* (2007) *Inter. Jour. Mass Spectrom.* 259, 105-116 suffers from high false negative rates, as we have described in Xia *et al.* (2007) *Proteomics* 7, 2904-2919. In other words, the method is inherently conservative to begin with, and applying a conservative correction to eliminate an even greater number of ORFs from consideration was probably unwise for this dataset.

**Log<sub>2</sub> Ratio:** this is the global log<sub>2</sub> ratio of the average of the normalized total spectral count values for Methanol/Succinate,  $\log_2[(MeOH\_1 + MeOH\_2) \div (Succin\_1 + Succin\_2)]$ .

**Log<sub>2</sub> Sum:** the sum of the normalized global spectral counts for both MeOH and Succinate. This number is primarily useful for estimating the degree to which a particular ORF is represented in the dataset.

**Log<sub>2</sub> MeOH:** the sum of normalized spectral counts associated with a particular ORF in the methanol nutrient data.

**Log<sub>2</sub> Succ:** the sum of normalized spectral counts associated with a particular ORF in the succinate nutrient data.

## Protein Intensity fields

**q-value:** this is a measure of false discovery rate that is discussed in the main text. In this study any *q*-value less than 0.01 was judged to be significant. Similarly to a *p*-value, the *q*-value is influenced by both the magnitude of the abundance change and the variance, but in terms of false discovery rate rather than false positive rate. It implicitly contains a correction for multiple hypothesis testing. See Storey and Tibshirani (2003) as cited above. As described in the main text, the summed intensity *q*-value was derived from the uncorrected *p*-value associated with a *t*-test as described for proteomics data in Xia *et al.* (2007) *Inter. Jour. Mass Spectrom.* 259, 105-116. The key difference in detail in this work is that the actual value of *t* for the global score over *n* = 4 summed signal intensity comparisons was calculated as paired *t* according to the method described in Sokal and Rohlf (1995), which differs from that given in the citation above. This is the paired *t*-test that has been in common use for microarray expression data for a number of years. The equation for global *t* is given below (*n* = 4), where *sd* is standard deviation:

$$t = \frac{\{(MeOH\_1 - Succin\_1) + (MeOH\_1 - Succin\_2) + (MeOH\_2 - Succin\_1) + (MeOH\_2 - Succin\_2)\} / n}{sd / \sqrt{n}}$$

The value of paired *t* was calculated in R to derive the *p*-value, which in turn served as the input into the QVALUE R package, *see* <http://faculty.washington.edu/jstorey/qvalue/>. The correction for multiple hypothesis testing contained in the *q*-value is significantly less conservative in practice than other, more common corrections to the *p*-value, such as the Bonferroni method. This is a good thing for summed intensity as well, because the paired *t*-test was quite sensitive to the noisiness inherent in the method, yielding relatively few abundance changes relative to the spectral counts. The *t*-test originally presented in Xia *et al.* (2007) cited above was probably slightly too liberal, the test used here was probably too conservative. We are exploring variance shrinkage approaches to optimizing our use of the *t*-test as a means to find a middle ground that agrees more precisely with our intuitive ideas as experimentalists regarding significance for this type of data. The previously published *t*-test, that was also used to evaluate the four individual MeOH/succinate comparisons prior to calculating a global value using the equation above, was more powerful because it based *n* and *m* on the number of redundant unique peptides associated with a protein, rather than the number of comparisons, *n* = 4 comparisons versus  $(m + n) \geq \sim 6$  peptides, the approximate minimum number that will allow for a call as significantly changed.

$$t = \frac{X - Y}{\sqrt{m \cdot sd_x^2 + n \cdot sd_y^2}}$$

where  $X$  and  $Y$  are the summed intensities over all redundant unique peptides  $m$  and  $n$  for each state for a single protein in a two state experiment. Using this approach without modification required unrealistically low  $q$  cut-offs when applied globally, so the conventional paired  $t$ -test was used instead.

**Log<sub>2</sub> Ratio:** this is the global log<sub>2</sub> ratio of the average of the normalized total summed intensity values for Methanol/Succinate,  $\log_2[(MeOH\_1 + MeOH\_2) \div (Succin\_1 + Succin\_2)]$ .

**Log<sub>2</sub> Sum:** the sum of the normalized global summed intensity values for both MeOH and Succinate. This number is primarily useful for estimating the degree to which a particular ORF is represented in the dataset.

**Log<sub>2</sub> MeOH:** the sum of normalized total summed intensity for a particular ORF in the methanol nutrient data.

**Log<sub>2</sub> Succ:** the sum of normalized total summed intensity for a particular ORF in the succinate nutrient data.

**gene name:** self-explanatory

### **Abundance Change fields**

The proteomic relative abundance color codes in these two fields follow what has evolved as a standard format in Hackett's lab: **green**, an abundance ratio significantly greater than zero on a log<sub>2</sub> scale (higher relative abundance in MeOH) at a  $q$ -value cutoff of 0.01; **red**, an abundance ratio significantly less than zero on a log<sub>2</sub> scale (lower relative abundance in MeOH, higher in succinate); **yellow**, detected qualitatively but lacking statistical support for abundance change; **black**, no data for this ORF, a qualitative non-detect. This color scheme is the opposite of that commonly employed to code for Cy3 and Cy5 dyes in microarray false color images. This is done intentionally to emphasize the point that this is a completely different technology, thus we use green to indicate up-regulation for the ratio MeOH/succinate.

**Sc:** color code for global spectral counting significance.

**Pi:** color code for global summed signal intensity significance.

**Desc:** the gene functional description.

### **Transcription Microarray Data Fields**

This data is a summary of the microarray results previously published in Okubo, Skovran *et al.* (2007) *Omic*s 11, 325-340.

**Log Avg Ratio:** the  $\log_{10}$  expression ratio of MeOH/succinate published in the original paper cited above.

**Log<sub>2</sub> Avg Ratio:** self-explanatory. The  $\log_2$  transformation allows a more intuitive direct comparison with the proteomics abundance ratios.

**Avg p-value:** the linear  $p$ -value given in the array paper cited above.

**Avg Log p-value:** the  $\log_{10}$   $p$ -value given in the array paper cited above.

**SAM  $\delta=1.25$ :** Significance Analysis of Microarrays score reported in the original array paper cited above. For an explanation of the SAM score, see <http://www-stat.stanford.edu/~tibs/SAM/> and the citation above from Okubo, Skovran *et al.*

**Probe:** key to the probes used to construct the AM1 microarray, see the citation above.

### **Supplemental Table S3**

This table includes a global data summary for those ORFs known or suspected to be involved in the metabolism of methanol and succinate for which proteomic data was collected, as of the state of curation that existed on December 15, 2007. This is a subset of Table S1 and lists the ORFs in order of 2002 RMQ number. The field headings are explained in the notes above at the beginning of this file.



| ORF             | Protein Spectral Count                                                                                |                        |                      |                       |                       | Protein Intensity |                        |                      |                       |                       | gene name | Abundance Change |    | Transcription Microarray Data |                            |             |                 |                                 |       |  |
|-----------------|-------------------------------------------------------------------------------------------------------|------------------------|----------------------|-----------------------|-----------------------|-------------------|------------------------|----------------------|-----------------------|-----------------------|-----------|------------------|----|-------------------------------|----------------------------|-------------|-----------------|---------------------------------|-------|--|
|                 | q-value                                                                                               | log <sub>2</sub> Ratio | log <sub>2</sub> Sum | log <sub>2</sub> MeOH | log <sub>2</sub> Succ | q-value           | log <sub>2</sub> Ratio | log <sub>2</sub> Sum | log <sub>2</sub> MeOH | log <sub>2</sub> Succ |           | Sc               | Pi | Log Avg Ratio                 | Log <sub>2</sub> Avg Ratio | Avg p-Value | Avg Log p-Value | SAM $\hat{\rho}=1.25$ obs score | Probe |  |
| <b>RMQ00003</b> | 0.001549                                                                                              | -0.280                 | 8.100                | 6.954                 | 7.234                 | 0.046410          | -0.560                 | 26.988               | 25.179                | 25.700                | mxcE      |                  |    | -0.0578                       | -0.1921                    | 0.327307    | -0.5975         |                                 | 461c  |  |
| Desc            | Transcriptional regulator, Methanol utilization control regulatory protein MxcE                       |                        |                      |                       |                       |                   |                        |                      |                       |                       |           |                  |    |                               |                            |             |                 |                                 |       |  |
| <b>RMQ00015</b> | 0.000000                                                                                              | 0.620                  | 9.640                | 8.919                 | 8.298                 | 0.008291          | 0.750                  | 28.054               | 27.010                | 26.255                | meaA      |                  |    | 0.1776                        | 0.5900                     | 0.004167    | -3.0785         | 3.0591                          | 978c  |  |
| Desc            | A mutase, Methylmalonyl-CoA mutase homolog                                                            |                        |                      |                       |                       |                   |                        |                      |                       |                       |           |                  |    |                               |                            |             |                 |                                 |       |  |
| <b>RMQ00044</b> | 0.000000                                                                                              | 0.540                  | 11.370               | 10.611                | 10.073                | 0.008236          | 0.620                  | 31.021               | 29.909                | 29.288                | mxaJ      |                  |    | 0.1340                        | 0.4451                     | 0.141808    | -2.2858         | 1.8792                          | 376c  |  |
| Desc            | MxaJ protein                                                                                          |                        |                      |                       |                       |                   |                        |                      |                       |                       |           |                  |    |                               |                            |             |                 |                                 |       |  |
| <b>RMQ00079</b> | 0.999913                                                                                              | -0.090                 | 6.970                | 5.921                 | 6.011                 | 0.040243          | -0.420                 | 25.780               | 24.063                | 24.481                | folP      |                  |    | -0.1072                       | -0.3561                    | 0.094876    | -1.3991         | -1.7781                         | 708c  |  |
| Desc            | Dihydroxypteroate synthase (EC 2.5.1.15)                                                              |                        |                      |                       |                       |                   |                        |                      |                       |                       |           |                  |    |                               |                            |             |                 |                                 |       |  |
| <b>RMQ00403</b> | 0.999913                                                                                              | -0.670                 | 4.250                | 2.874                 | 3.545                 | 0.101646          | -0.650                 | 22.705               | 20.792                | 21.400                | dyr       |                  |    | -0.0087                       | -0.0290                    | 0.262931    | -0.6588         |                                 | 780c  |  |
| Desc            | DHFR, Dihydrofolate reductase (EC 1.5.1.3)                                                            |                        |                      |                       |                       |                   |                        |                      |                       |                       |           |                  |    |                               |                            |             |                 |                                 |       |  |
| <b>RMQ00448</b> | 0.009910                                                                                              | 0.890                  | 6.450                | 5.831                 | 4.939                 | 0.059325          | 0.780                  | 24.313               | 23.287                | 22.565                | mcmA      |                  |    | 0.3311                        | 1.0999                     | 0.000236    | -7.8535         | 4.0739                          | 449cn |  |
| Desc            | Methylmalonyl-CoA mutase alpha subunit                                                                |                        |                      |                       |                       |                   |                        |                      |                       |                       |           |                  |    |                               |                            |             |                 |                                 |       |  |
| <b>RMQ00777</b> | 0.099668                                                                                              | 0.310                  | 8.890                | 8.035                 | 7.727                 | 0.038006          | 0.390                  | 27.717               | 26.490                | 26.105                | fhcA      |                  |    | -0.0136                       | -0.0451                    | 0.529619    | -0.2953         |                                 | 1081c |  |
| Desc            | Formyltransferase/hydrolase complex, alpha subunit                                                    |                        |                      |                       |                       |                   |                        |                      |                       |                       |           |                  |    |                               |                            |             |                 |                                 |       |  |
| <b>RMQ00778</b> | 0.999913                                                                                              | -0.080                 | 9.080                | 8.037                 | 8.122                 | 0.108593          | 0.360                  | 27.114               | 25.902                | 25.494                | fhcB      |                  |    | 0.0113                        | 0.0376                     | 0.705538    | -0.1930         |                                 | 474c  |  |
| Desc            | Formyltransferase/hydrolase complex, beta subunit                                                     |                        |                      |                       |                       |                   |                        |                      |                       |                       |           |                  |    |                               |                            |             |                 |                                 |       |  |
| <b>RMQ01050</b> | 0.000000                                                                                              | -1.270                 | 10.980               | 9.207                 | 10.475                | 0.001345          | -1.950                 | 30.793               | 27.863                | 29.808                |           |                  |    | -0.5037                       | -1.6732                    | 0.000000    | -15.4455        | -6.5162                         | 628   |  |
| Desc            | Isocitrate dehydrogenase [NADP] (EC 1.1.1.42)                                                         |                        |                      |                       |                       |                   |                        |                      |                       |                       |           |                  |    |                               |                            |             |                 |                                 |       |  |
| <b>RMQ01146</b> | 0.000000                                                                                              | 0.510                  | 9.870                | 9.097                 | 8.591                 | 0.032946          | 0.390                  | 28.344               | 27.117                | 26.738                | meaC      |                  |    | 0.0562                        | 0.1866                     | 0.279511    | -0.7836         |                                 | 667c  |  |
| Desc            | mesaconyl coA hydratase                                                                               |                        |                      |                       |                       |                   |                        |                      |                       |                       |           |                  |    |                               |                            |             |                 |                                 |       |  |
| <b>RMQ01208</b> | 0.630978                                                                                              | -0.290                 | 7.980                | 6.825                 | 7.114                 | 0.101444          | -0.390                 | 26.035               | 24.334                | 24.766                | croR      |                  |    | 0.1091                        | 0.3625                     | 0.108393    | -1.5372         | 1.7254                          | 180c  |  |
| Desc            | cROTONASE; 3-hydroxybutyryl-CoA dehydratase                                                           |                        |                      |                       |                       |                   |                        |                      |                       |                       |           |                  |    |                               |                            |             |                 |                                 |       |  |
| <b>RMQ01238</b> | 0.999913                                                                                              | 0.040                  | 4.410                | 3.430                 | 3.392                 | 0.255116          | -0.560                 | 22.444               | 20.875                | 21.010                | orf19     |                  |    | -0.0267                       | -0.0887                    | 0.685670    | -0.1681         |                                 | 419c  |  |
| Desc            | Cofactor biosynthesis, participates in tetrahydromethanopterin-linked formaldehyde oxidation, orfB117 |                        |                      |                       |                       |                   |                        |                      |                       |                       |           |                  |    |                               |                            |             |                 |                                 |       |  |
| <b>RMQ01365</b> | 0.000000                                                                                              | -0.630                 | 10.700               | 9.351                 | 9.980                 | 0.010307          | -1.110                 | 30.097               | 27.832                | 28.951                | gap20     |                  |    | -0.5961                       | -1.9802                    | 0.000000    | -18.5712        | -9.4593                         | 229cn |  |
| Desc            | Granule associated protein                                                                            |                        |                      |                       |                       |                   |                        |                      |                       |                       |           |                  |    |                               |                            |             |                 |                                 |       |  |

| ORF             | Protein Spectral Count                                                                          |                        |                      |                       |                       | Protein Intensity |                        |                      |                       |                       | gene name | Abundance Change |    | Transcription Microarray Data |                            |             |                 |                                 |       |  |
|-----------------|-------------------------------------------------------------------------------------------------|------------------------|----------------------|-----------------------|-----------------------|-------------------|------------------------|----------------------|-----------------------|-----------------------|-----------|------------------|----|-------------------------------|----------------------------|-------------|-----------------|---------------------------------|-------|--|
|                 | q-value                                                                                         | log <sub>2</sub> Ratio | log <sub>2</sub> Sum | log <sub>2</sub> MeOH | log <sub>2</sub> Succ | q-value           | log <sub>2</sub> Ratio | log <sub>2</sub> Sum | log <sub>2</sub> MeOH | log <sub>2</sub> Succ |           | Sc               | Pi | Log Avg Ratio                 | Log <sub>2</sub> Avg Ratio | Avg p-Value | Avg Log p-Value | SAM $\hat{\rho}=1.25$ obs score | Probe |  |
| <b>RMQ01883</b> | 0.000000                                                                                        | -2.360                 | 8.740                | 6.126                 | 8.483                 | 0.034218          | -3.160                 | 28.701               | 24.531                | 27.763                | pntB      |                  |    | -0.7559                       | -2.5109                    | 0.000000    | -23.4573        | -15.0692                        | 753   |  |
| Desc            | NADP transhydrogenase subunit beta (EC 1.6.1.2)                                                 |                        |                      |                       |                       |                   |                        |                      |                       |                       |           |                  |    |                               |                            |             |                 |                                 |       |  |
| <b>RMQ02159</b> | 0.000000                                                                                        | -1.540                 | 11.160               | 9.188                 | 10.730                | 0.003893          | -1.750                 | 30.063               | 27.295                | 29.040                | pdhB      |                  |    | -0.3999                       | -1.3285                    | 0.000000    | -11.0799        | -8.2296                         | 964c  |  |
| Desc            | Pyruvate dehydrogenase E1 component beta subunit (EC 1.2.4.1)                                   |                        |                      |                       |                       |                   |                        |                      |                       |                       |           |                  |    |                               |                            |             |                 |                                 |       |  |
| <b>RMQ02161</b> | 0.000000                                                                                        | -1.190                 | 10.310               | 8.589                 | 9.783                 | 0.000544          | -1.370                 | 29.241               | 26.800                | 28.170                | pdhC      |                  |    | -0.4445                       | -1.4764                    | 0.000000    | -12.4699        | -8.3222                         | 1068c |  |
| Desc            | Dihydropolipoamide acetyltransferase, component of pyruvate dehydrogenase complex (EC 2.3.1.12) |                        |                      |                       |                       |                   |                        |                      |                       |                       |           |                  |    |                               |                            |             |                 |                                 |       |  |
| <b>RMQ02662</b> | 0.000000                                                                                        | -4.060                 | 5.520                | 1.373                 | 5.437                 | 0.059200          | -7.010                 | 23.110               | 15.193                | 22.508                | sucT1     |                  |    | -1.2267                       | -4.0750                    | 0.000000    | -30.9253        | -16.9500                        | 568   |  |
| Desc            | C4-dicarboxylate transport protein (permease)                                                   |                        |                      |                       |                       |                   |                        |                      |                       |                       |           |                  |    |                               |                            |             |                 |                                 |       |  |
| <b>RMQ02792</b> | 0.003134                                                                                        | -0.570                 | 7.600                | 6.286                 | 6.858                 | 0.084904          | -0.560                 | 26.264               | 24.489                | 24.990                | nuoB      |                  |    | -0.4234                       | -1.4065                    | 0.000000    | -10.0642        | -8.3134                         | 213c  |  |
| Desc            | NADH-quinone oxidoreductase chain B (EC 1.6.5.3)                                                |                        |                      |                       |                       |                   |                        |                      |                       |                       |           |                  |    |                               |                            |             |                 |                                 |       |  |
| <b>RMQ03311</b> | 0.000000                                                                                        | 2.450                  | 11.940               | 11.695                | 9.247                 | 0.002195          | 2.900                  | 29.738               | 29.368                | 26.478                | mtdA      |                  |    | 0.7793                        | 2.5887                     | 0.000000    | -23.6669        | 11.4528                         | 612c  |  |
| Desc            | Methylenetetrahydromethanopterin/methylenetetrahydrofolate dehydrogenase                        |                        |                      |                       |                       |                   |                        |                      |                       |                       |           |                  |    |                               |                            |             |                 |                                 |       |  |
| <b>RMQ03312</b> | 0.000000                                                                                        | 1.880                  | 10.400               | 10.056                | 8.179                 | 0.001795          | 2.350                  | 28.903               | 28.413                | 26.062                | hpr       |                  |    | 0.6368                        | 2.1153                     | 0.000000    | -18.7976        | 6.6519                          | 432c  |  |
| Desc            | Hydroxypyruvate reductase                                                                       |                        |                      |                       |                       |                   |                        |                      |                       |                       |           |                  |    |                               |                            |             |                 |                                 |       |  |
| <b>RMQ03407</b> | 0.999913                                                                                        | 0.340                  | 4.380                | 3.541                 | 3.197                 | 0.072873          | 0.610                  | 21.994               | 20.897                | 20.244                | orf7      |                  |    | 0.0007                        | 0.0024                     | 0.636392    | -0.1983         |                                 | 237c  |  |
| Desc            | Cofactor biosynthesis, (C1-, Me-S)                                                              |                        |                      |                       |                       |                   |                        |                      |                       |                       |           |                  |    |                               |                            |             |                 |                                 |       |  |
| <b>RMQ03495</b> | 0.999913                                                                                        | 0.090                  | 4.670                | 3.717                 | 3.624                 | 0.255116          | -0.250                 | 22.328               | 20.795                | 20.888                | fdh3B     |                  |    | -0.2336                       | -0.7759                    | 0.459360    | -0.3708         | -3.4817                         | 559c  |  |
| Desc            | Formate dehydrogenase beta subunit, Cytochrome-linked; formate dehydrogenase, beta subunit      |                        |                      |                       |                       |                   |                        |                      |                       |                       |           |                  |    |                               |                            |             |                 |                                 |       |  |
| <b>RMQ03496</b> | 0.999913                                                                                        | -0.190                 | 3.130                | 2.036                 | 2.223                 | 0.099824          | 0.410                  | 20.805               | 19.580                | 19.140                | fdh3C     |                  |    | -0.1708                       | -0.5673                    | 0.004841    | -2.6436         | -3.1806                         | 505c  |  |
| Desc            | Formate dehydrogenase gamma subunit, Cytochrome-linked; formate dehydrogenase, gamma subunit    |                        |                      |                       |                       |                   |                        |                      |                       |                       |           |                  |    |                               |                            |             |                 |                                 |       |  |
| <b>RMQ03649</b> | 0.000005                                                                                        | -2.040                 | 5.460                | 3.108                 | 5.143                 | 0.010344          | -2.270                 | 23.449               | 20.438                | 22.507                | qscR      |                  |    | -0.0443                       | -0.1471                    | 0.516364    | -0.3236         |                                 | 413c  |  |
| Desc            | Serine cycle transcriptional regulator                                                          |                        |                      |                       |                       |                   |                        |                      |                       |                       |           |                  |    |                               |                            |             |                 |                                 |       |  |
| <b>RMQ03665</b> | 0.002624                                                                                        | 1.040                  | 6.290                | 5.723                 | 4.682                 | 0.161072          | -0.100                 | 25.336               | 23.805                | 23.897                | nuoI      |                  |    | -0.4719                       | -1.5677                    | 0.000000    | -13.5404        | -6.9989                         | 66c   |  |
| Desc            | NADH-quinone oxidoreductase chain I (EC 1.6.5.3)                                                |                        |                      |                       |                       |                   |                        |                      |                       |                       |           |                  |    |                               |                            |             |                 |                                 |       |  |
| <b>RMQ03831</b> | 0.000000                                                                                        | 0.480                  | 10.940               | 10.158                | 9.677                 | 0.200513          | 0.100                  | 30.596               | 29.205                | 29.126                | phaB      |                  |    | -0.0192                       | -0.0638                    | 0.253225    | -0.8002         |                                 | 276c  |  |
| Desc            | Acetoacetyl-CoA reductase                                                                       |                        |                      |                       |                       |                   |                        |                      |                       |                       |           |                  |    |                               |                            |             |                 |                                 |       |  |

| ORF             | Protein Spectral Count                                                                  |                        |                      |                       |                       | Protein Intensity |                        |                      |                       |                       | gene name | Abundance Change |    | Transcription Microarray Data |                            |             |                 |                                 |       |
|-----------------|-----------------------------------------------------------------------------------------|------------------------|----------------------|-----------------------|-----------------------|-------------------|------------------------|----------------------|-----------------------|-----------------------|-----------|------------------|----|-------------------------------|----------------------------|-------------|-----------------|---------------------------------|-------|
|                 | q-value                                                                                 | log <sub>2</sub> Ratio | log <sub>2</sub> Sum | log <sub>2</sub> MeOH | log <sub>2</sub> Succ | q-value           | log <sub>2</sub> Ratio | log <sub>2</sub> Sum | log <sub>2</sub> MeOH | log <sub>2</sub> Succ |           | Sc               | Pi | Log Avg Ratio                 | Log <sub>2</sub> Avg Ratio | Avg p-Value | Avg Log p-Value | SAM $\hat{\rho}=1.25$ obs score | Probe |
| <b>RMQ04144</b> | 0.103952                                                                                | 1.070                  | 5.510                | 4.946                 | 3.875                 | 0.184878          | -0.170                 | 25.024               | 23.204                | 23.607                | mxaS      | ●                | ●  | -0.0178                       | -0.0592                    | 0.676291    | -0.1837         |                                 | 341c  |
| Desc            | Methanol oxidation protein, unknown function                                            |                        |                      |                       |                       |                   |                        |                      |                       |                       | Y         | Y                |    |                               |                            |             |                 |                                 |       |
| <b>RMQ04203</b> | 0.999913                                                                                | -0.420                 | 3.260                | 2.036                 | 2.459                 | 0.101646          | -0.680                 | 21.975               | 20.043                | 20.856                | orf5      | ●                | ●  | 0.0057                        | 0.0188                     | 0.701490    | -0.1581         |                                 | 441c  |
| Desc            | Orf5 (Archaeal)                                                                         |                        |                      |                       |                       |                   |                        |                      |                       |                       | Y         | Y                |    |                               |                            |             |                 |                                 |       |
| <b>RMQ04236</b> | 0.000000                                                                                | 4.660                  | 5.710                | 5.657                 | 1.000                 | 0.000031          | 9.880                  | 24.531               | 24.434                | 14.578                | fdh2C     | ●                | ●  | 0.8310                        | 2.7605                     | 0.000000    | -21.2726        | 12.1072                         | 232c  |
| Desc            | NAD-linked formate dehydrogenase gamma subunit, Molybdenum-dependent                    |                        |                      |                       |                       |                   |                        |                      |                       |                       | G         | G                |    |                               |                            |             |                 |                                 |       |
| <b>RMQ04256</b> | 0.045995                                                                                | 0.040                  | 8.980                | 8.004                 | 7.963                 | 0.043403          | 0.270                  | 27.912               | 26.614                | 26.343                | mxAR      | ●                | ●  | 0.1072                        | 0.3563                     | 0.189062    | -1.8018         |                                 | 587c  |
| Desc            | Methanol oxidation, unknown function                                                    |                        |                      |                       |                       |                   |                        |                      |                       |                       | Y         | Y                |    |                               |                            |             |                 |                                 |       |
| <b>RMQ04586</b> | 0.000000                                                                                | 0.300                  | 11.060               | 10.206                | 9.903                 | 0.041599          | 0.230                  | 29.732               | 28.408                | 28.188                | ibd2      | ●                | ●  | 0.1649                        | 0.5479                     | 0.020853    | -3.0785         | 2.3292                          | 839c  |
| Desc            | Isobutyryl-CoA dehydrogenase, Acyl-CoA dehydrogenase, medium-chain specific             |                        |                      |                       |                       |                   |                        |                      |                       |                       | G         | Y                |    |                               |                            |             |                 |                                 |       |
| <b>RMQ04612</b> | 0.062390                                                                                | 0.880                  | 6.150                | 5.528                 | 4.644                 | 0.006998          | 1.210                  | 25.703               | 24.866                | 23.679                | mxah      | ●                | ●  | 0.0619                        | 0.2057                     | 0.385603    | -0.5998         |                                 | 319c  |
| Desc            | Methanol oxidation, unknown function                                                    |                        |                      |                       |                       |                   |                        |                      |                       |                       | Y         | G                |    |                               |                            |             |                 |                                 |       |
| <b>RMQ04643</b> | 0.000000                                                                                | -0.890                 | 10.330               | 8.819                 | 9.707                 | 0.005062          | -1.490                 | 29.125               | 26.569                | 28.058                |           | ●                | ●  | -0.2962                       | -0.9840                    | 0.000437    | -4.8302         | -4.3353                         | 1046c |
| Desc            | Phosphoenolpyruvate (PEP) synthase, pyruvate diphosphate kinase (EC 2.7.9.1)            |                        |                      |                       |                       |                   |                        |                      |                       |                       | R         | R                |    |                               |                            |             |                 |                                 |       |
| <b>RMQ04824</b> | 0.000000                                                                                | 0.490                  | 10.930               | 10.153                | 9.659                 | 0.122349          | 0.140                  | 29.743               | 28.371                | 28.221                | eno       | ●                | ●  | -0.0262                       | -0.0869                    | 0.355883    | -0.5868         |                                 | 720c  |
| Desc            | Enolase (EC 4.2.1.11)                                                                   |                        |                      |                       |                       |                   |                        |                      |                       |                       | G         | Y                |    |                               |                            |             |                 |                                 |       |
| <b>RMQ05001</b> | 0.000000                                                                                | -1.450                 | 10.450               | 8.551                 | 9.997                 | 0.000822          | -1.900                 | 29.331               | 26.442                | 28.343                | pdhD      | ●                | ●  | -0.5551                       | -1.8441                    | 0.000000    | -16.7017        | -7.2334                         | 523c  |
| Desc            | Dihydrolipoamide dehydrogenase, putative subunit of pyruvate dehydrogenase (EC 1.8.1.4) |                        |                      |                       |                       |                   |                        |                      |                       |                       | R         | R                |    |                               |                            |             |                 |                                 |       |
| <b>RMQ05266</b> | 0.706090                                                                                | 0.480                  | 6.310                | 5.528                 | 5.044                 | 0.053274          | 0.490                  | 25.682               | 24.516                | 24.031                | mxAA      | ●                | ●  | 0.0780                        | 0.2590                     | 0.299488    | -0.6013         |                                 | 581c  |
| Desc            | Essential for Ca <sup>2+</sup> insertion into MDH                                       |                        |                      |                       |                       |                   |                        |                      |                       |                       | Y         | Y                |    |                               |                            |             |                 |                                 |       |
| <b>RMQ05267</b> | 0.999913                                                                                | 0.390                  | 4.790                | 3.976                 | 3.585                 | 0.101770          | 0.780                  | 22.423               | 21.383                | 20.734                | mxAL      | ●                | ●  | 0.0836                        | 0.2777                     | 0.173667    | -0.9050         |                                 | 461c  |
| Desc            | Essential for Ca <sup>2+</sup> insertion into MDH                                       |                        |                      |                       |                       |                   |                        |                      |                       |                       | Y         | Y                |    |                               |                            |             |                 |                                 |       |
| <b>RMQ05268</b> | 0.156983                                                                                | -0.040                 | 9.010                | 7.992                 | 8.034                 | 0.204371          | -0.080                 | 28.835               | 27.269                | 27.378                | mxAD      | ●                | ●  | 0.0864                        | 0.2869                     | 0.157411    | -1.1321         |                                 | 251c  |
| Desc            | Essential for Ca <sup>2+</sup> insertion into MDH                                       |                        |                      |                       |                       |                   |                        |                      |                       |                       | Y         | Y                |    |                               |                            |             |                 |                                 |       |
| <b>RMQ05335</b> | 0.000000                                                                                | -1.190                 | 10.330               | 8.616                 | 9.803                 | 0.003440          | -1.430                 | 30.225               | 27.742                | 29.176                | fumA      | ●                | ●  | -0.5377                       | -1.7864                    | 0.000000    | -14.7414        | -8.3561                         | 1057c |
| Desc            | Fumarase, Fumarate hydratase (EC 4.2.1.2)                                               |                        |                      |                       |                       |                   |                        |                      |                       |                       | R         | R                |    |                               |                            |             |                 |                                 |       |

| ORF             | Protein Spectral Count                                                                  |                        |                      |                       |                       | Protein Intensity |                        |                      |                       |                       | gene name | Abundance Change |    | Transcription Microarray Data |                            |             |                 |                                  |       |  |
|-----------------|-----------------------------------------------------------------------------------------|------------------------|----------------------|-----------------------|-----------------------|-------------------|------------------------|----------------------|-----------------------|-----------------------|-----------|------------------|----|-------------------------------|----------------------------|-------------|-----------------|----------------------------------|-------|--|
|                 | q-value                                                                                 | log <sub>2</sub> Ratio | log <sub>2</sub> Sum | log <sub>2</sub> MeOH | log <sub>2</sub> Succ | q-value           | log <sub>2</sub> Ratio | log <sub>2</sub> Sum | log <sub>2</sub> MeOH | log <sub>2</sub> Succ |           | Sc               | Pi | Log Avg Ratio                 | Log <sub>2</sub> Avg Ratio | Avg p-Value | Avg Log p-Value | SAM $\hat{\beta}=1.25$ obs score | Probe |  |
| <b>RMQ05448</b> | 0.690172                                                                                | -0.010                 | 9.590                | 8.591                 | 8.597                 | 0.292660          | 0.000                  | 28.658               | 27.202                | 27.202                | epm       | ●                | ●  | -0.0760                       | -0.2524                    | 0.274924    | -1.1399         |                                  | 181c  |  |
| Desc            | Epimerase, Methylmalonyl CoA epimerase (EC 5.1.99.1)                                    |                        |                      |                       |                       |                   |                        |                      |                       |                       |           |                  |    |                               |                            |             |                 |                                  |       |  |
| <b>RMQ05670</b> | 0.000000                                                                                | 0.610                  | 9.250                | 8.518                 | 7.908                 | 0.045042          | 0.350                  | 28.747               | 27.497                | 27.163                | mch       | ●                | ●  | 0.0535                        | 0.1776                     | 0.312308    | -0.5363         |                                  | 594c  |  |
| Desc            | N5,N10-methenyltetrahydromethanopterin cyclohydrolase (EC 3.5.4.27)                     |                        |                      |                       |                       |                   |                        |                      |                       |                       |           |                  |    |                               |                            |             |                 |                                  |       |  |
| <b>RMQ05674</b> | 0.999913                                                                                | -0.430                 | 2.610                | 1.373                 | 1.807                 | 0.102426          | -1.720                 | 19.158               | 15.193                | 18.079                | orfY      | ●                | ●  | 0.0019                        | 0.0062                     | 0.665742    | -0.1791         |                                  | 641c  |  |
| Desc            | Carbamoyl-phosphate synthase large chain (EC 6.3.5.5)                                   |                        |                      |                       |                       |                   |                        |                      |                       |                       |           |                  |    |                               |                            |             |                 |                                  |       |  |
| <b>RMQ05675</b> | 0.024371                                                                                | 0.310                  | 9.050                | 8.194                 | 7.887                 | 0.053077          | -0.250                 | 27.718               | 26.078                | 26.333                | mtdB      | ●                | ●  | 0.0005                        | 0.0018                     | 0.678645    | -0.1725         |                                  | 471c  |  |
| Desc            | Methylene tetrahydromethanopterin dehydrogenase (NAD+/NADP+)                            |                        |                      |                       |                       |                   |                        |                      |                       |                       |           |                  |    |                               |                            |             |                 |                                  |       |  |
| <b>RMQ05676</b> | 0.295782                                                                                | -0.690                 | 6.050                | 4.669                 | 5.358                 | 0.055104          | -0.680                 | 24.193               | 22.314                | 22.983                | orf4      | ●                | ●  | 0.0112                        | 0.0373                     | 0.496385    | -0.3977         |                                  | 589c  |  |
| Desc            | Tetrahydromethanopterin biosynthesis, Hypothetical 34.4 kDa protein                     |                        |                      |                       |                       |                   |                        |                      |                       |                       |           |                  |    |                               |                            |             |                 |                                  |       |  |
| <b>RMQ05703</b> | 0.999913                                                                                | -0.290                 | 2.530                | 1.373                 | 1.664                 | 0.038262          | -2.820                 | 18.904               | 15.193                | 18.125                | sdhD      | ●                | ●  | -0.5144                       | -1.7089                    | 0.000000    | -14.8547        | -8.7208                          | 209c  |  |
| Desc            | Succinate dehydrogenase delta subunit, Succinate dehydrogenase membrane anchor subunit  |                        |                      |                       |                       |                   |                        |                      |                       |                       |           |                  |    |                               |                            |             |                 |                                  |       |  |
| <b>RMQ05704</b> | 0.999913                                                                                | 0.110                  | 2.640                | 1.692                 | 1.585                 | 0.203045          | 0.490                  | 18.900               | 17.651                | 17.081                | sdhC      | ●                | ●  | -0.6172                       | -2.0501                    | 0.000000    | -18.0968        | -8.1446                          | 41c   |  |
| Desc            | Succinate dehydrogenase gamma subunit, Succinate dehydrogenase cytochrome B-556 subunit |                        |                      |                       |                       |                   |                        |                      |                       |                       |           |                  |    |                               |                            |             |                 |                                  |       |  |
| <b>RMQ05964</b> | 0.000000                                                                                | 1.160                  | 8.790                | 8.260                 | 7.102                 | 0.021437          | 1.830                  | 29.184               | 28.559                | 26.823                | mxal      | ●                | ●  | 0.2482                        | 0.8244                     | 0.002434    | -5.5010         | 3.2776                           | 204c  |  |
| Desc            | Methanol dehydrogenase small subunit (EC 1.1.99.8)                                      |                        |                      |                       |                       |                   |                        |                      |                       |                       |           |                  |    |                               |                            |             |                 |                                  |       |  |
| <b>RMQ05965</b> | 0.000000                                                                                | 0.600                  | 10.160               | 9.428                 | 8.827                 | 0.036336          | 0.300                  | 28.873               | 27.569                | 27.275                | mxag      | ●                | ●  | -0.0421                       | -0.1397                    | 0.265600    | -1.5653         |                                  | 207c  |  |
| Desc            | Cytochrome c1                                                                           |                        |                      |                       |                       |                   |                        |                      |                       |                       |           |                  |    |                               |                            |             |                 |                                  |       |  |
| <b>RMQ05966</b> | 0.000000                                                                                | 0.640                  | 14.710               | 13.995                | 13.359                | 0.007563          | 0.950                  | 34.851               | 33.902                | 32.963                | mxaf      | ●                | ●  | 0.2498                        | 0.8297                     | 0.089257    | -5.9896         | 2.2442                           | 1256c |  |
| Desc            | Methanol dehydrogenase large subunit (EC 1.1.99.8)                                      |                        |                      |                       |                       |                   |                        |                      |                       |                       |           |                  |    |                               |                            |             |                 |                                  |       |  |
| <b>RMQ05969</b> | 0.000000                                                                                | 2.360                  | 11.290               | 11.035                | 8.676                 | 0.000174          | 2.660                  | 30.172               | 29.755                | 27.097                | fftL      | ●                | ●  | 0.4472                        | 1.4855                     | 0.000000    | -12.6017        | 7.8166                           | 1300c |  |
| Desc            | Formate-tetrahydrofolate ligase                                                         |                        |                      |                       |                       |                   |                        |                      |                       |                       |           |                  |    |                               |                            |             |                 |                                  |       |  |
| <b>RMQ05989</b> | 0.000000                                                                                | -2.960                 | 7.960                | 4.820                 | 7.784                 | 0.064761          | -3.460                 | 26.985               | 22.272                | 26.022                | mqq       | ●                | ●  | -0.5311                       | -1.7644                    | 0.000000    | -15.1757        | -6.8485                          | 1021  |  |
| Desc            | Malate:quinine oxidoreductase (EC 1.1.99.16)                                            |                        |                      |                       |                       |                   |                        |                      |                       |                       |           |                  |    |                               |                            |             |                 |                                  |       |  |
| <b>RMQ06009</b> | 0.000440                                                                                | -0.610                 | 8.080                | 6.743                 | 7.356                 | 0.045567          | -0.510                 | 27.158               | 25.339                | 25.848                | phaC      | ●                | ●  | -0.2950                       | -0.9800                    | 0.003842    | -6.1631         | -3.4135                          | 871d  |  |
| Desc            | Poly 3-hydroxyalkanoate polymerase (EC 2.3.1.-)                                         |                        |                      |                       |                       |                   |                        |                      |                       |                       |           |                  |    |                               |                            |             |                 |                                  |       |  |

| ORF             | Protein Spectral Count                                                                                          |                        |                      |                       |                       | Protein Intensity |                        |                      |                       |                       | gene name | Abundance Change |    | Transcription Microarray Data |                            |             |                 |                                 |       |
|-----------------|-----------------------------------------------------------------------------------------------------------------|------------------------|----------------------|-----------------------|-----------------------|-------------------|------------------------|----------------------|-----------------------|-----------------------|-----------|------------------|----|-------------------------------|----------------------------|-------------|-----------------|---------------------------------|-------|
|                 | q-value                                                                                                         | log <sub>2</sub> Ratio | log <sub>2</sub> Sum | log <sub>2</sub> MeOH | log <sub>2</sub> Succ | q-value           | log <sub>2</sub> Ratio | log <sub>2</sub> Sum | log <sub>2</sub> MeOH | log <sub>2</sub> Succ |           | Sc               | Pi | Log Avg Ratio                 | Log <sub>2</sub> Avg Ratio | Avg p-Value | Avg Log p-Value | SAM $\hat{\rho}=1.25$ obs score | Probe |
| <b>RMQ06072</b> | 0.000000                                                                                                        | -2.090                 | 11.070               | 8.672                 | 10.762                | 0.000365          | -3.510                 | 31.772               | 27.448                | 30.939                | gap11     |                  |    | -0.4439                       | -1.4747                    | 0.000000    | -13.0196        | -7.1152                         | 290c  |
| Desc            | Granule associated protein                                                                                      |                        |                      |                       |                       |                   |                        |                      |                       |                       | R         | R                |    |                               |                            |             |                 |                                 |       |
| <b>RMQ06075</b> | 0.000000                                                                                                        | -0.600                 | 9.170                | 7.835                 | 8.439                 | 0.001471          | -0.770                 | 27.962               | 25.976                | 26.746                |           |                  |    | -0.2042                       | -0.6783                    | 0.012542    | -4.0646         | -2.9767                         | 400d  |
| Desc            | 3-oxoadipate CoA-transferase subunit A (EC 2.8.3.6)/ Acyl CoA:acetate/3-ketoacid CoA transferase, alpha subunit |                        |                      |                       |                       |                   |                        |                      |                       |                       | R         | R                |    |                               |                            |             |                 |                                 |       |
| <b>RMQ06161</b> | 0.000000                                                                                                        | -1.360                 | 9.330                | 7.500                 | 8.857                 | 0.013006          | -1.970                 | 28.753               | 25.770                | 27.745                | pdhA      |                  |    | -0.4928                       | -1.6369                    | 0.000000    | -14.4125        | -6.0517                         | 757c  |
| Desc            | Pyruvate dehydrogenase E1 component alpha subunit (EC 1.2.4.1)                                                  |                        |                      |                       |                       |                   |                        |                      |                       |                       | R         | Y                |    |                               |                            |             |                 |                                 |       |
| <b>RMQ06255</b> | 0.000000                                                                                                        | -2.610                 | 8.920                | 6.099                 | 8.704                 | 0.023999          | -1.840                 | 25.824               | 22.962                | 24.782                |           |                  |    | -0.0996                       | -0.3309                    | 0.116678    | -1.3843         |                                 | 101   |
| Desc            | Pyruvate,phosphate dikinase (EC 2.7.9.1)                                                                        |                        |                      |                       |                       |                   |                        |                      |                       |                       | R         | Y                |    |                               |                            |             |                 |                                 |       |
| <b>RMQ06367</b> | 0.000728                                                                                                        | 1.520                  | 5.250                | 4.820                 | 3.297                 | 0.006416          | 3.440                  | 24.400               | 24.091                | 20.942                | mxaw      |                  |    | 0.0474                        | 0.1575                     | 0.459603    | -0.4135         |                                 | 681c  |
| Desc            | Methanol oxidation, unknown function                                                                            |                        |                      |                       |                       |                   |                        |                      |                       |                       | G         | G                |    |                               |                            |             |                 |                                 |       |
| <b>RMQ06481</b> | 0.999913                                                                                                        | 0.250                  | 6.860                | 5.976                 | 5.728                 | 0.108721          | 0.520                  | 25.548               | 24.460                | 23.790                | mxab      |                  |    | 0.0664                        | 0.2205                     | 0.374058    | -0.6229         |                                 | 627c  |
| Desc            | Transcriptional regulator, involved in methanol oxidation                                                       |                        |                      |                       |                       |                   |                        |                      |                       |                       | Y         | Y                |    |                               |                            |             |                 |                                 |       |
| <b>RMQ06485</b> | 0.000000                                                                                                        | -0.770                 | 8.430                | 6.993                 | 7.763                 | 0.044933          | -0.710                 | 27.683               | 25.718                | 26.422                | sucD      |                  |    | -0.1853                       | -0.6155                    | 0.033439    | -2.7730         | -2.6614                         | 242   |
| Desc            | Succinyl-CoA synthetase alpha chain (EC 6.2.1.5)                                                                |                        |                      |                       |                       |                   |                        |                      |                       |                       | R         | Y                |    |                               |                            |             |                 |                                 |       |
| <b>RMQ06486</b> | 0.000002                                                                                                        | -0.600                 | 8.770                | 7.443                 | 8.038                 | 0.024029          | -0.980                 | 28.160               | 26.054                | 27.023                | sucD      |                  |    | -0.1876                       | -0.6231                    | 0.009819    | -2.6474         | -3.0763                         | 241   |
| Desc            | Succinyl-CoA synthetase alpha chain (EC 6.2.1.5)                                                                |                        |                      |                       |                       |                   |                        |                      |                       |                       | R         | Y                |    |                               |                            |             |                 |                                 |       |
| <b>RMQ06487</b> | 0.000000                                                                                                        | -0.810                 | 9.760                | 8.293                 | 9.105                 | 0.002013          | -1.190                 | 29.675               | 27.380                | 28.572                | sucC      |                  |    | -0.2725                       | -0.9051                    | 0.000048    | -6.5944         | -4.0590                         | 655   |
| Desc            | Succinyl-CoA synthetase beta chain (EC 6.2.1.5)                                                                 |                        |                      |                       |                       |                   |                        |                      |                       |                       | R         | R                |    |                               |                            |             |                 |                                 |       |
| <b>RMQ06488</b> | 0.000000                                                                                                        | -0.890                 | 11.360               | 9.848                 | 10.742                | 0.008236          | -1.000                 | 30.772               | 28.626                | 29.610                | mdh       |                  |    | -0.0078                       | -0.0259                    | 0.379707    | -0.6137         |                                 | 74c   |
| Desc            | mdh, Malate dehydrogenase (EC 1.1.1.37)                                                                         |                        |                      |                       |                       |                   |                        |                      |                       |                       | R         | R                |    |                               |                            |             |                 |                                 |       |
| <b>RMQ06654</b> | 0.000000                                                                                                        | -2.510                 | 11.930               | 9.194                 | 11.699                | 0.002695          | -2.840                 | 31.611               | 27.924                | 30.713                | pntA      |                  |    | -0.8199                       | -2.7238                    | 0.000000    | -24.9448        | -12.8487                        | 697   |
| Desc            | NADP transhydrogenase alpha subunit (EC 1.6.1.2)                                                                |                        |                      |                       |                       |                   |                        |                      |                       |                       | R         | R                |    |                               |                            |             |                 |                                 |       |
| <b>RMQ06958</b> | 0.000000                                                                                                        | 2.420                  | 11.870               | 11.627                | 9.203                 | 0.000395          | 3.010                  | 31.828               | 31.478                | 28.481                | mcl       |                  |    | 0.7540                        | 2.5049                     | 0.000000    | -21.2843        | 8.6860                          | 506c  |
| Desc            | Malyl-CoA lyase (EC 4.1.3.24)                                                                                   |                        |                      |                       |                       |                   |                        |                      |                       |                       | G         | G                |    |                               |                            |             |                 |                                 |       |
| <b>RMQ06988</b> | 0.000000                                                                                                        | 3.470                  | 9.650                | 9.529                 | 6.062                 | 0.003479          | 4.400                  | 29.424               | 29.225                | 24.825                | mtkB      |                  |    | 0.9416                        | 3.1279                     | 0.000000    | -25.9938        | 15.6636                         | 453c  |
| Desc            | Malate thiokinase, beta subunit                                                                                 |                        |                      |                       |                       |                   |                        |                      |                       |                       | G         | G                |    |                               |                            |             |                 |                                 |       |

| ORF      | Protein Spectral Count                                                                                     |                        |                      |                       |                       | Protein Intensity |                        |                      |                       |                       | gene name | Abundance Change |    | Transcription Microarray Data |                            |             |                 |                                 |       |
|----------|------------------------------------------------------------------------------------------------------------|------------------------|----------------------|-----------------------|-----------------------|-------------------|------------------------|----------------------|-----------------------|-----------------------|-----------|------------------|----|-------------------------------|----------------------------|-------------|-----------------|---------------------------------|-------|
|          | q-value                                                                                                    | log <sub>2</sub> Ratio | log <sub>2</sub> Sum | log <sub>2</sub> MeOH | log <sub>2</sub> Succ | q-value           | log <sub>2</sub> Ratio | log <sub>2</sub> Sum | log <sub>2</sub> MeOH | log <sub>2</sub> Succ |           | Sc               | Pi | Log Avg Ratio                 | Log <sub>2</sub> Avg Ratio | Avg p-Value | Avg Log p-Value | SAM $\hat{\rho}=1.25$ obs score | Probe |
| RMQ06989 | 0.000000                                                                                                   | 4.210                  | 10.560               | 10.482                | 6.270                 | 0.000174          | 4.410                  | 29.347               | 29.150                | 24.776                | mtkA      |                  |    | 0.4131                        | 1.3723                     | 0.000000    | -11.2565        | 5.6789                          | 586c  |
| Desc     | Malate thiokinase, alpha subunit                                                                           |                        |                      |                       |                       |                   |                        |                      |                       |                       |           | G                | G  |                               |                            |             |                 |                                 |       |
| RMQ06990 | 0.000000                                                                                                   | 2.670                  | 10.320               | 10.108                | 7.435                 | 0.001593          | 3.540                  | 28.557               | 28.279                | 24.804                | fch       |                  |    | 0.3522                        | 1.1699                     | 0.000051    | -8.8739         | 4.0102                          | 370c  |
| Desc     | Methenyltetrahydrofolate cyclohydrolase (EC 3.5.4.9)                                                       |                        |                      |                       |                       |                   |                        |                      |                       |                       |           | G                | G  |                               |                            |             |                 |                                 |       |
| RMQ07025 | 0.407858                                                                                                   | -0.260                 | 8.270                | 7.135                 | 7.392                 | 0.101564          | -0.240                 | 26.642               | 25.044                | 25.266                | pqqG      |                  |    | 0.0058                        | 0.0193                     | 0.572878    | -0.3237         |                                 | 1061c |
| Desc     | PQQ synthesis, ZINC PROTEASE                                                                               |                        |                      |                       |                       |                   |                        |                      |                       |                       |           | Y                | Y  |                               |                            |             |                 |                                 |       |
| RMQ07071 | 0.000000                                                                                                   | -0.910                 | 10.930               | 9.406                 | 10.316                | 0.001447          | -1.270                 | 30.441               | 28.071                | 29.343                |           |                  |    | -0.3999                       | -1.3286                    | 0.000000    | -10.9756        | -4.7010                         | 609c  |
| Desc     | Citrate synthase (EC 4.1.3.7)                                                                              |                        |                      |                       |                       |                   |                        |                      |                       |                       |           | R                | R  |                               |                            |             |                 |                                 |       |
| RMQ07145 | 0.999913                                                                                                   | 0.040                  | 7.950                | 6.966                 | 6.929                 | 0.289893          | 0.000                  | 25.813               | 24.354                | 24.352                | folC      |                  |    | -0.3996                       | -1.3276                    | 0.000000    | -11.3866        | -7.1982                         | 1024c |
| Desc     | Dihydrofolate synthase, FOLYLPOLYGLUTAMATE SYNTHASE (EC 6.3.2.17)                                          |                        |                      |                       |                       |                   |                        |                      |                       |                       |           | Y                | Y  |                               |                            |             |                 |                                 |       |
| RMQ07583 | 0.394553                                                                                                   | 0.440                  | 6.880                | 6.086                 | 5.649                 | 0.012089          | 0.220                  | 25.189               | 23.860                | 23.637                | meaB      |                  |    | 0.0173                        | 0.0573                     | 0.545718    | -0.3072         |                                 | 488c  |
| Desc     | Essential for methylmalonyl-CoA mutase reaction                                                            |                        |                      |                       |                       |                   |                        |                      |                       |                       |           | Y                | Y  |                               |                            |             |                 |                                 |       |
| RMQ07614 | 0.999913                                                                                                   | 0.020                  | 3.420                | 2.430                 | 2.414                 | 0.137013          | 0.680                  | 21.098               | 19.958                | 19.533                | dmrA      |                  |    | -0.1233                       | -0.4096                    | 0.154957    | -1.0659         | -2.0553                         | 62c   |
| Desc     | Dihyromethanopterin reductase                                                                              |                        |                      |                       |                       |                   |                        |                      |                       |                       |           | Y                | Y  |                               |                            |             |                 |                                 |       |
| RMQ07639 | 0.000275                                                                                                   | 0.640                  | 7.590                | 6.876                 | 6.235                 | 0.022387          | 0.840                  | 26.280               | 25.284                | 24.433                | meaD      |                  |    | 0.0322                        | 0.1068                     | 0.310008    | -0.8011         |                                 | 423c  |
| Desc     | Hypothetical cytosolic protein                                                                             |                        |                      |                       |                       |                   |                        |                      |                       |                       |           | G                | Y  |                               |                            |             |                 |                                 |       |
| RMQ07691 | 0.999913                                                                                                   | -0.190                 | 6.130                | 5.034                 | 5.229                 | 0.084622          | -0.370                 | 23.812               | 22.127                | 22.519                | mxcQ      |                  |    | 0.0293                        | 0.0974                     | 0.555174    | -0.3194         |                                 | 986c  |
| Desc     | Sensor kinase, Methanol utilization control sensor protein moxY                                            |                        |                      |                       |                       |                   |                        |                      |                       |                       |           | Y                | Y  |                               |                            |             |                 |                                 |       |
| RMQ07705 | 0.000000                                                                                                   | -1.480                 | 10.500               | 8.577                 | 10.053                | 0.002020          | -1.550                 | 29.715               | 27.134                | 28.673                | maeB      |                  |    | -0.3942                       | -1.3095                    | 0.000000    | -8.3218         | -7.1531                         | 1497c |
| Desc     | NAD-dependent malic enzyme (EC 1.1.1.39)                                                                   |                        |                      |                       |                       |                   |                        |                      |                       |                       |           | R                | R  |                               |                            |             |                 |                                 |       |
| RMQ07911 | 0.000000                                                                                                   | 1.190                  | 7.730                | 7.202                 | 6.015                 | 0.016190          | 1.660                  | 26.665               | 25.983                | 24.310                | fdh1B     |                  |    | 0.3250                        | 1.0796                     | 0.000001    | -7.5724         | 5.5046                          | 1287c |
| Desc     | Tungsten-containing formate dehydrogenase beta subunit; NAD-dependent formate dehydrogenase beta subunit   |                        |                      |                       |                       |                   |                        |                      |                       |                       |           | G                | Y  |                               |                            |             |                 |                                 |       |
| RMQ07912 | 0.000000                                                                                                   | 1.320                  | 7.670                | 7.181                 | 5.858                 | 0.021900          | 1.550                  | 26.027               | 25.218                | 23.805                | fdh1A     |                  |    | 0.3437                        | 1.1418                     | 0.000002    | -8.2193         | 4.8330                          | 1987c |
| Desc     | Tungsten-containing formate dehydrogenase alpha subunit; NAD-dependent formate dehydrogenase alpha subunit |                        |                      |                       |                       |                   |                        |                      |                       |                       |           | G                | Y  |                               |                            |             |                 |                                 |       |
| RMQ07918 | 0.000000                                                                                                   | 0.510                  | 12.320               | 11.550                | 11.040                | 0.000845          | 0.720                  | 31.212               | 30.141                | 29.423                | glyA      |                  |    | 0.1625                        | 0.5397                     | 0.009093    | -2.8804         | 2.7071                          | 916c  |
| Desc     | Serine hydroxymethyltransferase (EC 2.1.2.1)                                                               |                        |                      |                       |                       |                   |                        |                      |                       |                       |           | G                | G  |                               |                            |             |                 |                                 |       |

| ORF      | Protein Spectral Count                                                |                        |                      |                       |                       | Protein Intensity |                        |                      |                       |                       | gene name | Abundance Change |    | Transcription Microarray Data |                            |             |                 |                                  |       |  |
|----------|-----------------------------------------------------------------------|------------------------|----------------------|-----------------------|-----------------------|-------------------|------------------------|----------------------|-----------------------|-----------------------|-----------|------------------|----|-------------------------------|----------------------------|-------------|-----------------|----------------------------------|-------|--|
|          | q-value                                                               | log <sub>2</sub> Ratio | log <sub>2</sub> Sum | log <sub>2</sub> MeOH | log <sub>2</sub> Succ | q-value           | log <sub>2</sub> Ratio | log <sub>2</sub> Sum | log <sub>2</sub> MeOH | log <sub>2</sub> Succ |           | Sc               | Pi | Log Avg Ratio                 | Log <sub>2</sub> Avg Ratio | Avg p-Value | Avg Log p-Value | SAM $\hat{\beta}=1.25$ obs score | Probe |  |
| RMQ08314 | 0.999913                                                              | -0.090                 | 7.010                | 5.966                 | 6.055                 | 0.042268          | 0.290                  | 25.381               | 24.098                | 23.812                | folE      | ●                | ●  | -0.0372                       | -0.1235                    | 0.464801    | -0.5298         |                                  | 350c  |  |
| Desc     | folE, GTP synthase, GTP cyclohydrolase I (EC 3.5.4.16)                |                        |                      |                       |                       |                   |                        |                      |                       |                       |           |                  |    |                               |                            |             |                 |                                  |       |  |
| RMQ08757 | 0.343025                                                              | 0.250                  | 8.730                | 7.846                 | 7.594                 | 0.037149          | 0.190                  | 27.417               | 26.062                | 25.871                | fhcD      | ●                | ●  | 0.0548                        | 0.1821                     | 0.478368    | -0.3466         |                                  | 421c  |  |
| Desc     | Formyltransferase/hydrolase complex, delta subunit                    |                        |                      |                       |                       |                   |                        |                      |                       |                       |           |                  |    |                               |                            |             |                 |                                  |       |  |
| RMQ08759 | 0.000121                                                              | 0.720                  | 7.660                | 6.971                 | 6.254                 | 0.054804          | 0.480                  | 26.523               | 25.351                | 24.856                | fhcC      | ●                | ●  | 0.0289                        | 0.0961                     | 0.564469    | -0.2779         |                                  | 241c  |  |
| Desc     | Formyltransferase/hydrolase complex, gamma subunit                    |                        |                      |                       |                       |                   |                        |                      |                       |                       |           |                  |    |                               |                            |             |                 |                                  |       |  |
| RMQ08763 | 0.891061                                                              | 0.140                  | 8.170                | 7.242                 | 7.105                 | 0.155222          | 0.200                  | 26.190               | 24.880                | 24.659                | mxmB      | ●                | ●  | 0.0373                        | 0.1240                     | 0.496879    | -0.4208         |                                  | 294c  |  |
| Desc     | Transcriptional regulator, methanol oxidation                         |                        |                      |                       |                       |                   |                        |                      |                       |                       |           |                  |    |                               |                            |             |                 |                                  |       |  |
| RMQ08765 | 0.056892                                                              | 0.260                  | 8.000                | 7.131                 | 6.866                 | 0.096333          | 0.390                  | 26.737               | 25.527                | 25.117                | pqqB      | ●                | ●  | 0.0130                        | 0.0432                     | 0.610677    | -0.2382         |                                  | 473c  |  |
| Desc     | Coenzyme PQQ synthesis protein B                                      |                        |                      |                       |                       |                   |                        |                      |                       |                       |           |                  |    |                               |                            |             |                 |                                  |       |  |
| RMQ08766 | 0.000000                                                              | 0.870                  | 9.750                | 9.125                 | 8.251                 | 0.025692          | 0.890                  | 28.573               | 27.597                | 26.755                | pqqC/D    | ●                | ●  | 0.0226                        | 0.0752                     | 0.334933    | -0.9182         |                                  | 634c  |  |
| Desc     | Coenzyme PQQ synthesis protein C/D                                    |                        |                      |                       |                       |                   |                        |                      |                       |                       |           |                  |    |                               |                            |             |                 |                                  |       |  |
| RMQ08767 | 0.000000                                                              | 1.360                  | 7.750                | 7.274                 | 5.919                 | 0.000740          | 1.160                  | 26.480               | 25.609                | 24.453                | pqqE      | ●                | ●  | 0.2095                        | 0.6960                     | 0.002327    | -4.2203         | 3.2674                           | 693c  |  |
| Desc     | Coenzyme PQQ synthesis protein E                                      |                        |                      |                       |                       |                   |                        |                      |                       |                       |           |                  |    |                               |                            |             |                 |                                  |       |  |
| RMQ08769 | 0.999913                                                              | 0.370                  | 2.200                | 1.373                 | 1.000                 | 0.101548          | 2.240                  | 17.893               | 17.548                | 14.578                | folB      | ●                | ●  | 0.0255                        | 0.0846                     | 0.512143    | -0.3359         |                                  | 61c   |  |
| Desc     | folB, Dihydroneopterin aldolase (EC 4.1.2.25)                         |                        |                      |                       |                       |                   |                        |                      |                       |                       |           |                  |    |                               |                            |             |                 |                                  |       |  |
| RMQ08770 | 0.999913                                                              | 0.180                  | 5.920                | 5.005                 | 4.824                 | 0.005062          | -0.300                 | 23.706               | 22.057                | 22.352                | folK      | ●                | ●  | -0.0869                       | -0.2888                    | 0.239307    | -0.6740         | -1.7572                          | 428c  |  |
| Desc     | 2-amino-4-hydroxy-6-hydroxymethyl-7,8-dihydropterin pyrophosphokinase |                        |                      |                       |                       |                   |                        |                      |                       |                       |           |                  |    |                               |                            |             |                 |                                  |       |  |
| RMQ08958 | 0.999913                                                              | -0.090                 | 7.900                | 6.852                 | 6.943                 | 0.289893          | 0.010                  | 26.065               | 24.583                | 24.586                | fdh3A     | ●                | ●  | -0.2023                       | -0.6721                    | 0.049496    | -1.5074         | -3.8796                          | 1684c |  |
| Desc     | Formate dehydrogenase alpha subunit, Cytochrome-linked                |                        |                      |                       |                       |                   |                        |                      |                       |                       |           |                  |    |                               |                            |             |                 |                                  |       |  |
| RMQ09345 | 0.000000                                                              | -0.880                 | 10.550               | 9.037                 | 9.921                 | 0.013242          | -1.250                 | 30.305               | 27.924                | 29.183                | acnA      | ●                | ●  | -0.6833                       | -2.2699                    | 0.000000    | -20.2527        | -8.6672                          | 1746  |  |
| Desc     | Aconitate hydratase (EC 4.2.1.3)                                      |                        |                      |                       |                       |                   |                        |                      |                       |                       |           |                  |    |                               |                            |             |                 |                                  |       |  |
| RMQ09375 | 0.999913                                                              | -0.040                 | 6.350                | 5.333                 | 5.375                 | 0.025848          | -0.760                 | 25.170               | 23.223                | 23.971                | phaR      | ●                | ●  | -0.0767                       | -0.2549                    | 0.264675    | -0.8997         |                                  | 681c  |  |
| Desc     | Regulator of PHB synthesis and acetyl-CoA flux                        |                        |                      |                       |                       |                   |                        |                      |                       |                       |           |                  |    |                               |                            |             |                 |                                  |       |  |
| RMQ09543 | 0.000000                                                              | 0.140                  | 10.790               | 9.860                 | 9.723                 | 0.102426          | 0.190                  | 29.765               | 28.428                | 28.247                | pccB      | ●                | ●  | 0.1697                        | 0.5639                     | 0.117155    | -3.3004         | 2.1050                           | 1337c |  |
| Desc     | Propionyl-CoA carboxylase, beta subunit (EC 6.4.1.3)                  |                        |                      |                       |                       |                   |                        |                      |                       |                       |           |                  |    |                               |                            |             |                 |                                  |       |  |

| ORF             | Protein Spectral Count                                                                                                                                                                               |                        |                      |                       |                       | Protein Intensity |                        |                      |                       |                       | gene name | Abundance Change |    | Transcription Microarray Data |                            |             |                 |                                 |       |
|-----------------|------------------------------------------------------------------------------------------------------------------------------------------------------------------------------------------------------|------------------------|----------------------|-----------------------|-----------------------|-------------------|------------------------|----------------------|-----------------------|-----------------------|-----------|------------------|----|-------------------------------|----------------------------|-------------|-----------------|---------------------------------|-------|
|                 | q-value                                                                                                                                                                                              | log <sub>2</sub> Ratio | log <sub>2</sub> Sum | log <sub>2</sub> MeOH | log <sub>2</sub> Succ | q-value           | log <sub>2</sub> Ratio | log <sub>2</sub> Sum | log <sub>2</sub> MeOH | log <sub>2</sub> Succ |           | Sc               | Pi | Log Avg Ratio                 | Log <sub>2</sub> Avg Ratio | Avg p-Value | Avg Log p-Value | SAM $\hat{\rho}=1.25$ obs score | Probe |
| <b>RMQ09548</b> | 0.000000                                                                                                                                                                                             | 0.580                  | 10.100               | 9.365                 | 8.780                 | 0.007563          | 0.430                  | 30.696               | 29.475                | 29.050                | ccr       |                  |    | 0.1788                        | 0.5940                     | 0.082700    | -3.5915         | 2.3026                          | 806c  |
| Desc            | Crotonyl-CoA reductase                                                                                                                                                                               |                        |                      |                       |                       |                   |                        |                      |                       |                       | G         | G                |    |                               |                            |             |                 |                                 |       |
| <b>RMQ09623</b> | 0.557310                                                                                                                                                                                             | -0.750                 | 5.570                | 4.144                 | 4.891                 | 0.037149          | -1.480                 | 25.049               | 22.420                | 23.948                | nuoL      |                  |    | -0.2950                       | -0.9800                    | 0.000000    | -7.2439         | -5.4546                         | 1612c |
| Desc            | NADH-quinone oxidoreductase chain L (EC 1.6.5.3)                                                                                                                                                     |                        |                      |                       |                       |                   |                        |                      |                       |                       | Y         | Y                |    |                               |                            |             |                 |                                 |       |
| <b>RMQ09624</b> | 0.999913                                                                                                                                                                                             | 0.370                  | 2.200                | 1.373                 | 1.000                 | 0.102426          | -2.920                 | 21.432               | 15.193                | 20.416                | nuoJ      |                  |    | -0.2357                       | -0.7830                    | 0.000128    | -4.5641         | -4.6119                         | 241c  |
| Desc            | NADH-quinone oxidoreductase chain J (EC 1.6.5.3)                                                                                                                                                     |                        |                      |                       |                       |                   |                        |                      |                       |                       | Y         | Y                |    |                               |                            |             |                 |                                 |       |
| <b>RMQ09626</b> | 0.000002                                                                                                                                                                                             | -0.510                 | 8.870                | 7.590                 | 8.097                 | 0.034390          | -0.880                 | 27.621               | 25.514                | 26.406                | nuoF      |                  |    | -0.4136                       | -1.3741                    | 0.000000    | -9.7609         | -8.1710                         | 957c  |
| Desc            | NADH-quinone oxidoreductase chain F (EC 1.6.5.3)                                                                                                                                                     |                        |                      |                       |                       |                   |                        |                      |                       |                       | R         | Y                |    |                               |                            |             |                 |                                 |       |
| <b>RMQ09627</b> | 0.830251                                                                                                                                                                                             | -0.030                 | 8.160                | 7.148                 | 7.180                 | 0.051608          | -0.360                 | 28.024               | 26.345                | 26.713                | nuoE      |                  |    | -0.3457                       | -1.1485                    | 0.000010    | -6.2528         | -6.4300                         | 1025c |
| Desc            | NADH-quinone oxidoreductase chain E (EC 1.6.5.3)                                                                                                                                                     |                        |                      |                       |                       |                   |                        |                      |                       |                       | Y         | Y                |    |                               |                            |             |                 |                                 |       |
| <b>RMQ09628</b> | 0.018092                                                                                                                                                                                             | -0.300                 | 8.660                | 7.506                 | 7.803                 | 0.032127          | -0.680                 | 27.527               | 25.628                | 26.271                | nuoD      |                  |    | -0.4280                       | -1.4218                    | 0.000000    | -12.2820        | -7.5788                         | 615c  |
| Desc            | NADH-quinone oxidoreductase chain D (EC 1.6.5.3)                                                                                                                                                     |                        |                      |                       |                       |                   |                        |                      |                       |                       | Y         | Y                |    |                               |                            |             |                 |                                 |       |
| <b>RMQ09629</b> | 0.999913                                                                                                                                                                                             | 0.260                  | 6.680                | 5.809                 | 5.544                 | 0.102426          | -0.230                 | 26.397               | 24.803                | 25.051                | nuoC      |                  |    | -0.4174                       | -1.3864                    | 0.000000    | -11.2359        | -7.4867                         | 561c  |
| Desc            | NADH-quinone oxidoreductase chain C (EC 1.6.5.3)                                                                                                                                                     |                        |                      |                       |                       |                   |                        |                      |                       |                       | Y         | Y                |    |                               |                            |             |                 |                                 |       |
| <b>RMQ09630</b> | 0.999913                                                                                                                                                                                             | 0.370                  | 2.200                | 1.373                 | 1.000                 | 0.102426          | -1.290                 | 18.415               | 15.193                | 17.280                | nuoA      |                  |    | -0.3998                       | -1.3281                    | 0.000000    | -10.7237        | -6.1329                         | 265c  |
| Desc            | NADH-quinone oxidoreductase chain A (EC 1.6.5.3)                                                                                                                                                     |                        |                      |                       |                       |                   |                        |                      |                       |                       | Y         | Y                |    |                               |                            |             |                 |                                 |       |
| <b>RMQ09677</b> | 0.999913                                                                                                                                                                                             | 0.180                  | 4.120                | 3.213                 | 3.030                 | 0.157581          | -0.190                 | 21.490               | 19.924                | 20.159                | orf22     |                  |    | -0.0150                       | -0.0497                    | 0.774735    | -0.1182         |                                 | 401c  |
| Desc            | Orf22, Cofactor biosynthesis, OrfB120                                                                                                                                                                |                        |                      |                       |                       |                   |                        |                      |                       |                       | Y         | Y                |    |                               |                            |             |                 |                                 |       |
| <b>RMQ09678</b> | 0.999913                                                                                                                                                                                             | -0.270                 | 3.100                | 1.956                 | 2.223                 | 0.090924          | 3.100                  | 20.753               | 20.151                | 18.505                | orf21     |                  |    | -0.1056                       | -0.3509                    | 0.256804    | -1.0151         |                                 | 360c  |
| Desc            | orf21, Cofactor biosynthesis, OrfB119, Cofactor biosynthesis, participates in tetrahydromethanopterin-linked formaldehyde oxidation, Cluster function: GLUTAMATE 5-KINASE / GAMMA-GLUTAMYL PHOSPHATE |                        |                      |                       |                       |                   |                        |                      |                       |                       | Y         | Y                |    |                               |                            |             |                 |                                 |       |
| <b>RMQ09680</b> | 0.024285                                                                                                                                                                                             | -0.840                 | 6.550                | 5.072                 | 5.915                 | 0.034563          | -1.030                 | 24.920               | 22.792                | 23.804                | orf9      |                  |    | 0.0128                        | 0.0426                     | 0.638348    | -0.2077         |                                 | 381c  |
| Desc            | tr Q9FA36 orf9, Cofactor biosynthesis beta                                                                                                                                                           |                        |                      |                       |                       |                   |                        |                      |                       |                       | Y         | Y                |    |                               |                            |             |                 |                                 |       |
| <b>RMQ09682</b> | 0.000000                                                                                                                                                                                             | 0.880                  | 13.880               | 13.251                | 12.374                | 0.000086          | 1.350                  | 33.123               | 32.330                | 30.981                | fae       |                  |    | 0.3611                        | 1.1997                     | 0.000000    | -9.7325         | 6.4110                          | 256c  |
| Desc            | Formaldehyde activating enzyme                                                                                                                                                                       |                        |                      |                       |                       |                   |                        |                      |                       |                       | G         | G                |    |                               |                            |             |                 |                                 |       |
| <b>RMQ10718</b> | 0.000000                                                                                                                                                                                             | -4.410                 | 5.850                | 1.373                 | 5.781                 | 0.000086          | -7.330                 | 23.282               | 15.193                | 22.515                | fumC2     |                  |    | -0.6987                       | -2.3212                    | 0.000000    | -15.6215        | -9.3137                         | 194n  |
| Desc            | Fumarate hydratase, class II (EC 4.2.1.2)                                                                                                                                                            |                        |                      |                       |                       |                   |                        |                      |                       |                       | R         | R                |    |                               |                            |             |                 |                                 |       |



| ORF             | Protein Spectral Count                                                                       |                        |                      |                       |                       | Protein Intensity |                        |                      |                       |                       | gene name | Abundance Change |    | Transcription Microarray Data |                            |             |                 |                                 |       |
|-----------------|----------------------------------------------------------------------------------------------|------------------------|----------------------|-----------------------|-----------------------|-------------------|------------------------|----------------------|-----------------------|-----------------------|-----------|------------------|----|-------------------------------|----------------------------|-------------|-----------------|---------------------------------|-------|
|                 | q-value                                                                                      | log <sub>2</sub> Ratio | log <sub>2</sub> Sum | log <sub>2</sub> MeOH | log <sub>2</sub> Succ | q-value           | log <sub>2</sub> Ratio | log <sub>2</sub> Sum | log <sub>2</sub> MeOH | log <sub>2</sub> Succ |           | Sc               | Pi | Log Avg Ratio                 | Log <sub>2</sub> Avg Ratio | Avg p-Value | Avg Log p-Value | SAM $\hat{\rho}=1.25$ obs score | Probe |
| <b>RMQ10844</b> | 0.999913                                                                                     | -1.060                 | 2.740                | 1.111                 | 2.170                 | 0.100907          | -2.710                 | 21.277               | 18.683                | 20.398                | pntA      | ●                | ●  | -0.7232                       | -2.4023                    | 0.000000    | -22.3650        | -10.5672                        | 404n  |
| Desc            | NADP transhydrogenase subunit alpha (EC 1.6.1.2)                                             |                        |                      |                       |                       |                   |                        |                      |                       |                       |           |                  |    |                               |                            |             |                 |                                 |       |
| <b>RMQ10950</b> | 0.000000                                                                                     | 0.610                  | 9.110                | 8.382                 | 7.776                 | 0.279368          | -0.060                 | 26.396               | 24.922                | 24.941                | eno       | ●                | ●  | -0.0506                       | -0.1682                    | 0.432975    | -0.6756         |                                 | 37c   |
| Desc            | eno, Enolase (EC 4.2.1.11)                                                                   |                        |                      |                       |                       |                   |                        |                      |                       |                       |           |                  |    |                               |                            |             |                 |                                 |       |
| <b>RMQ11484</b> | 0.000000                                                                                     | -0.970                 | 9.690                | 8.131                 | 9.099                 | 0.001340          | -1.430                 | 28.965               | 26.464                | 27.896                | sucB      | ●                | ●  | -0.2248                       | -0.7469                    | 0.000627    | -4.7806         | -3.1217                         | 864c  |
| Desc            | Dihydrolipoamide succinyltransferase, component (E2 of 2-oxoglutarate dehydrogenase complex) |                        |                      |                       |                       |                   |                        |                      |                       |                       |           |                  |    |                               |                            |             |                 |                                 |       |
| <b>RMQ11485</b> | 0.000000                                                                                     | -1.640                 | 10.850               | 8.814                 | 10.452                | 0.014723          | -1.700                 | 29.197               | 26.436                | 28.150                | sucA      | ●                | ●  | -0.3511                       | -1.1664                    | 0.000000    | -8.9532         | -5.3321                         | 1549c |
| Desc            | 2-oxoglutarate dehydrogenase E1 component (EC 1.2.4.2)                                       |                        |                      |                       |                       |                   |                        |                      |                       |                       |           |                  |    |                               |                            |             |                 |                                 |       |
| <b>RMQ11528</b> | 0.999913                                                                                     | -0.110                 | 6.540                | 5.487                 | 5.600                 | 0.152636          | -0.400                 | 23.994               | 22.322                | 22.616                |           | ●                | ●  | 0.2190                        | 0.7276                     | 0.044920    | -5.8738         | 1.9235                          | 1386  |
| Desc            | Pyruvate oxidase (EC 1.2.3.3)                                                                |                        |                      |                       |                       |                   |                        |                      |                       |                       |           |                  |    |                               |                            |             |                 |                                 |       |
| <b>RMQ11545</b> | 0.000000                                                                                     | -5.540                 | 6.680                | 1.111                 | 6.649                 | 0.028381          | -3.190                 | 25.665               | 21.590                | 24.732                | fumC2     | ●                | ●  | -0.2237                       | -0.7430                    | 0.000653    | -4.6976         | -3.3997                         | 721c  |
| Desc            | Fumarate hydratase, class II (EC 4.2.1.2)                                                    |                        |                      |                       |                       |                   |                        |                      |                       |                       |           |                  |    |                               |                            |             |                 |                                 |       |
| <b>RMQ11711</b> | 0.000571                                                                                     | 0.170                  | 10.620               | 9.705                 | 9.536                 | 0.014328          | 0.200                  | 29.527               | 28.178                | 27.977                | pccA      | ●                | ●  | 0.1716                        | 0.5701                     | 0.004962    | -2.8679         | 2.9367                          | 739c  |
| Desc            | Propionyl-CoA carboxylase alpha subunit, Propionyl-CoA carboxylase biotin-containing subunit |                        |                      |                       |                       |                   |                        |                      |                       |                       |           |                  |    |                               |                            |             |                 |                                 |       |
| <b>RMQ11863</b> | 0.261203                                                                                     | -0.450                 | 6.950                | 5.705                 | 6.160                 | 0.009386          | -0.900                 | 25.799               | 23.731                | 24.612                | sucT2     | ●                | ●  | -0.3834                       | -1.2735                    | 0.000000    | -10.8270        | -4.7049                         | 778   |
| Desc            | C4-dicarboxylate transport protein / Na+ or H+ symporter                                     |                        |                      |                       |                       |                   |                        |                      |                       |                       |           |                  |    |                               |                            |             |                 |                                 |       |
| <b>RMQ11864</b> | 0.999913                                                                                     | -0.270                 | 6.710                | 5.574                 | 5.841                 | 0.178319          | 0.150                  | 24.697               | 23.340                | 23.214                | pqqF      | ●                | ●  | 0.0393                        | 0.1307                     | 0.507642    | -0.3630         |                                 | 983c  |
| Desc            | pqqF, PQQ synthesis, ZINC PROTEASE (EC 3.4.99.-)                                             |                        |                      |                       |                       |                   |                        |                      |                       |                       |           |                  |    |                               |                            |             |                 |                                 |       |
| <b>RMQ11866</b> | 0.000000                                                                                     | 1.410                  | 8.930                | 8.466                 | 7.061                 | 0.009966          | 1.610                  | 28.112               | 27.424                | 25.815                | gck       | ●                | ●  | 0.3376                        | 1.1214                     | 0.001748    | -3.3714         | 4.2323                          | 563c  |
| Desc            | Glycerate kinase                                                                             |                        |                      |                       |                       |                   |                        |                      |                       |                       |           |                  |    |                               |                            |             |                 |                                 |       |
| <b>RMQ11999</b> | 0.000457                                                                                     | -0.690                 | 7.310                | 5.931                 | 6.617                 | 0.008612          | -1.080                 | 27.815               | 25.583                | 26.663                |           | ●                | ●  | -0.2212                       | -0.7348                    | 0.008005    | -4.8140         | -2.9226                         | 146   |
| Desc            | Pyruvate,phosphate dikinase (EC 2.7.9.1)                                                     |                        |                      |                       |                       |                   |                        |                      |                       |                       |           |                  |    |                               |                            |             |                 |                                 |       |
| <b>RMQ12088</b> | 0.000000                                                                                     | 3.420                  | 12.330               | 12.204                | 8.787                 | 0.000174          | 4.370                  | 31.779               | 31.578                | 27.209                | sga       | ●                | ●  | 1.0458                        | 3.4740                     | 0.000000    | -28.8913        | 12.5071                         | 709c  |
| Desc            | Serine glyoxylate aminotransferase                                                           |                        |                      |                       |                       |                   |                        |                      |                       |                       |           |                  |    |                               |                            |             |                 |                                 |       |
| <b>RMQ12137</b> | 0.000000                                                                                     | -1.790                 | 10.010               | 7.854                 | 9.640                 | 0.010633          | -2.410                 | 29.623               | 26.245                | 28.668                | sdhA      | ●                | ●  | -0.6771                       | -2.2493                    | 0.000000    | -19.6844        | -7.5234                         | 1720c |
| Desc            | Succinate dehydrogenase flavoprotein subunit, iron sulfur protein (EC 1.3.99.1)              |                        |                      |                       |                       |                   |                        |                      |                       |                       |           |                  |    |                               |                            |             |                 |                                 |       |

| ORF      | Protein Spectral Count                                                                                                             |                        |                      |                       |                       | Protein Intensity |                        |                      |                       |                       | gene name | Abundance Change |    | Transcription Microarray Data |                            |             |                 |                                 |       |  |
|----------|------------------------------------------------------------------------------------------------------------------------------------|------------------------|----------------------|-----------------------|-----------------------|-------------------|------------------------|----------------------|-----------------------|-----------------------|-----------|------------------|----|-------------------------------|----------------------------|-------------|-----------------|---------------------------------|-------|--|
|          | q-value                                                                                                                            | log <sub>2</sub> Ratio | log <sub>2</sub> Sum | log <sub>2</sub> MeOH | log <sub>2</sub> Succ | q-value           | log <sub>2</sub> Ratio | log <sub>2</sub> Sum | log <sub>2</sub> MeOH | log <sub>2</sub> Succ |           | Sc               | Pi | Log Avg Ratio                 | Log <sub>2</sub> Avg Ratio | Avg p-Value | Avg Log p-Value | SAM $\hat{\rho}=1.25$ obs score | Probe |  |
| RMQ12328 | 0.033522                                                                                                                           | 1.060                  | 5.850                | 5.286                 | 4.223                 | 0.014998          | 1.010                  | 24.280               | 23.358                | 22.383                | mxaC      |                  |    | 0.1101                        | 0.3659                     | 0.184697    | -1.6858         |                                 | 641c  |  |
| Desc     | Essential for Ca <sup>2+</sup> insertion into MDH                                                                                  |                        |                      |                       |                       |                   |                        |                      |                       |                       |           |                  |    |                               |                            |             |                 |                                 |       |  |
| RMQ12329 | 0.003244                                                                                                                           | 0.940                  | 6.360                | 5.752                 | 4.807                 | 0.003491          | 1.610                  | 25.244               | 24.556                | 22.966                | mxaK      |                  |    | 0.1192                        | 0.3961                     | 0.123333    | -1.2696         | 1.8819                          | 416c  |  |
| Desc     | Essential for Ca <sup>2+</sup> insertion into MDH                                                                                  |                        |                      |                       |                       |                   |                        |                      |                       |                       |           |                  |    |                               |                            |             |                 |                                 |       |  |
| RMQ12330 | 0.999913                                                                                                                           | 0.180                  | 6.960                | 6.048                 | 5.870                 | 0.121704          | 0.150                  | 25.437               | 24.038                | 23.900                | mxaE      |                  |    | 0.0757                        | 0.2514                     | 0.198889    | -0.7225         |                                 | 332c  |  |
| Desc     | Methanol oxidation, unknown function                                                                                               |                        |                      |                       |                       |                   |                        |                      |                       |                       |           |                  |    |                               |                            |             |                 |                                 |       |  |
| RMQ12432 | 0.000011                                                                                                                           | 0.480                  | 9.230                | 8.453                 | 7.973                 | 0.010414          | 0.810                  | 28.394               | 27.379                | 26.573                | mcmB      |                  |    | 0.1421                        | 0.4720                     | 0.019692    | -2.0832         | 2.5574                          | 1533c |  |
| Desc     | mcmB, Methylmalonyl-CoA mutase beta subunit (EC 5.4.99.2)                                                                          |                        |                      |                       |                       |                   |                        |                      |                       |                       |           |                  |    |                               |                            |             |                 |                                 |       |  |
| RMQ12606 | 0.098679                                                                                                                           | -0.220                 | 9.950                | 8.841                 | 9.057                 | 0.003827          | -0.450                 | 29.253               | 27.497                | 27.940                | nuoG      |                  |    | -0.3057                       | -1.0156                    | 0.000000    | -7.2560         | -5.6024                         | 1033c |  |
| Desc     | NADH-quinone oxidoreductase chain G (EC 1.6.5.3)                                                                                   |                        |                      |                       |                       |                   |                        |                      |                       |                       |           |                  |    |                               |                            |             |                 |                                 |       |  |
| RMQ12669 | 0.000000                                                                                                                           | 8.460                  | 9.460                | 9.456                 | 1.000                 | 0.000086          | 13.220                 | 27.864               | 27.769                | 14.578                | fdh2A     |                  |    | 0.9510                        | 3.1591                     | 0.000000    | -26.6746        | 15.8053                         | 1398c |  |
| Desc     | NAD-linked formate dehydrogenase alpha subunit; Molybdenum-dependent formate dehydrogenase, alpha subunit                          |                        |                      |                       |                       |                   |                        |                      |                       |                       |           |                  |    |                               |                            |             |                 |                                 |       |  |
| RMQ12670 | 0.000000                                                                                                                           | 8.110                  | 9.110                | 9.108                 | 1.000                 | 0.000031          | 13.130                 | 27.776               | 27.682                | 14.578                | fdh2B     |                  |    | 0.3144                        | 1.0444                     | 0.000005    | -7.9256         | 4.2410                          | 1103c |  |
| Desc     | NAD-linked formate dehydrogenase beta subunit; Molybdenum-dependent formate dehydrogenase, beta subunit                            |                        |                      |                       |                       |                   |                        |                      |                       |                       |           |                  |    |                               |                            |             |                 |                                 |       |  |
| RMQ12744 | 0.000261                                                                                                                           | 0.540                  | 8.210                | 7.450                 | 6.911                 | 0.015433          | 0.830                  | 27.440               | 26.438                | 25.623                | mcmA      |                  |    | 0.3290                        | 1.0930                     | 0.000107    | -7.8906         | 4.0705                          | 157cn |  |
| Desc     | Methylmalonyl-CoA mutase alpha subunit (EC 5.4.99.2)                                                                               |                        |                      |                       |                       |                   |                        |                      |                       |                       |           |                  |    |                               |                            |             |                 |                                 |       |  |
| RMQ12876 | 0.000000                                                                                                                           | 2.310                  | 7.680                | 7.410                 | 5.101                 | 0.006231          | 4.010                  | 26.492               | 26.249                | 22.298                | ppc       |                  |    | 0.5584                        | 1.8549                     | 0.000000    | -16.7263        | 7.6305                          | 1714c |  |
| Desc     | Phosphoenolpyruvate carboxylase (EC 4.1.1.31)                                                                                      |                        |                      |                       |                       |                   |                        |                      |                       |                       |           |                  |    |                               |                            |             |                 |                                 |       |  |
| RMQ12879 | 0.000604                                                                                                                           | 0.770                  | 7.220                | 6.558                 | 5.790                 | 0.090528          | 0.650                  | 25.271               | 24.208                | 23.525                | mxhD      |                  |    | 0.0295                        | 0.0980                     | 0.294059    | -0.6731         |                                 | 1201c |  |
| Desc     | Sensor kinase                                                                                                                      |                        |                      |                       |                       |                   |                        |                      |                       |                       |           |                  |    |                               |                            |             |                 |                                 |       |  |
| RMQ12882 | 0.999913                                                                                                                           | 0.360                  | 6.020                | 5.187                 | 4.824                 | 0.219837          | -0.170                 | 24.081               | 22.567                | 22.697                | orf20     |                  |    | -0.0569                       | -0.1889                    | 0.742998    | -0.1315         |                                 | 1031c |  |
| Desc     | Cofactor biosynthesis, participates in tetrahydromethanopterin-linked formaldehyde oxidation, C1-, Me-S), Dihydropteroate synthase |                        |                      |                       |                       |                   |                        |                      |                       |                       |           |                  |    |                               |                            |             |                 |                                 |       |  |
| RMQ08549 | 0.999913                                                                                                                           | 0.150                  | 2.300                | 1.373                 | 1.220                 | 0.102426          | -1.550                 | 18.860               | 15.193                | 18.245                | fdh4      |                  |    | 0.1746                        | 0.5801                     | 0.053324    | -2.4532         | 2.3322                          | 880   |  |
| Desc     | Formate dehydrogenase alpha chain (EC 1.2.1.2)                                                                                     |                        |                      |                       |                       |                   |                        |                      |                       |                       |           |                  |    |                               |                            |             |                 |                                 |       |  |
| RMQ02676 |                                                                                                                                    |                        |                      |                       |                       |                   |                        |                      |                       |                       | nuoM      |                  |    | -0.1967                       | -0.6534                    | 0.003086    | -3.3633         | -3.4466                         | 852c  |  |
| Desc     | NADH-quinone oxidoreductase chain M (EC 1.6.5.3)                                                                                   |                        |                      |                       |                       |                   |                        |                      |                       |                       |           |                  |    |                               |                            |             |                 |                                 |       |  |

| ORF             | Protein Spectral Count                                                       |                        |                      |                       |                       | Protein Intensity |                        |                      |                       |                       | gene name | Abundance Change                                                                      |                                                                                       | Transcription Microarray Data |                            |             |                 |                                   |       |
|-----------------|------------------------------------------------------------------------------|------------------------|----------------------|-----------------------|-----------------------|-------------------|------------------------|----------------------|-----------------------|-----------------------|-----------|---------------------------------------------------------------------------------------|---------------------------------------------------------------------------------------|-------------------------------|----------------------------|-------------|-----------------|-----------------------------------|-------|
|                 | q-value                                                                      | log <sub>2</sub> Ratio | log <sub>2</sub> Sum | log <sub>2</sub> MeOH | log <sub>2</sub> Succ | q-value           | log <sub>2</sub> Ratio | log <sub>2</sub> Sum | log <sub>2</sub> MeOH | log <sub>2</sub> Succ |           | Sc                                                                                    | Pi                                                                                    | Log Avg Ratio                 | Log <sub>2</sub> Avg Ratio | Avg p-Value | Avg Log p-Value | SAM $\hat{\theta}=1.25$ obs score | Probe |
| <b>RMQ03664</b> |                                                                              |                        |                      |                       |                       |                   |                        |                      |                       |                       | nuoK      |                                                                                       |                                                                                       | -0.2292                       | -0.7614                    | 0.000017    | -4.8289         | -4.9262                           | 329c  |
| Desc            | NADH-quinone oxidoreductase chain K (EC 1.6.5.3)                             |                        |                      |                       |                       |                   |                        |                      |                       |                       |           |                                                                                       |                                                                                       |                               |                            |             |                 |                                   |       |
| <b>RMQ06655</b> |                                                                              |                        |                      |                       |                       |                   |                        |                      |                       |                       | pntA      |                                                                                       |                                                                                       | -0.6281                       | -2.0867                    | 0.000000    | -19.6315        | -9.3126                           | 148n  |
| Desc            | NADP transhydrogenase alpha subunit (EC 1.6.1.2)                             |                        |                      |                       |                       |                   |                        |                      |                       |                       |           |                                                                                       |                                                                                       |                               |                            |             |                 |                                   |       |
| <b>RMQ08550</b> |                                                                              |                        |                      |                       |                       |                   |                        |                      |                       |                       | fdh4      |                                                                                       |                                                                                       | 0.3406                        | 1.1315                     | 0.047664    | -2.9209         | 2.8543                            | 452   |
| Desc            | Formate dehydrogenase alpha chain, (EC 1.2.1.2)                              |                        |                      |                       |                       |                   |                        |                      |                       |                       |           |                                                                                       |                                                                                       |                               |                            |             |                 |                                   |       |
| <b>RMQ09621</b> |                                                                              |                        |                      |                       |                       |                   |                        |                      |                       |                       | nuoN      |                                                                                       |                                                                                       | -0.2828                       | -0.9395                    | 0.000016    | -5.8515         | -5.0352                           | 984c  |
| Desc            | NADH-quinone oxidoreductase chain N (EC 1.6.5.3)                             |                        |                      |                       |                       |                   |                        |                      |                       |                       |           |                                                                                       |                                                                                       |                               |                            |             |                 |                                   |       |
| <b>RMQ09625</b> |                                                                              |                        |                      |                       |                       |                   |                        |                      |                       |                       | nuoH      |                                                                                       |                                                                                       | -0.4111                       | -1.3656                    | 0.000000    | -11.3154        | -5.5694                           | 572c  |
| Desc            | NADH-quinone oxidoreductase chain H (EC 1.6.5.3)                             |                        |                      |                       |                       |                   |                        |                      |                       |                       |           |                                                                                       |                                                                                       |                               |                            |             |                 |                                   |       |
| <b>RMQ10845</b> |                                                                              |                        |                      |                       |                       |                   |                        |                      |                       |                       | pntB      |                                                                                       |                                                                                       | -0.7975                       | -2.6492                    | 0.000000    | -24.3814        | -11.8044                          | 71n   |
| Desc            | NADP transhydrogenase subunit beta (EC 1.6.1.2)                              |                        |                      |                       |                       |                   |                        |                      |                       |                       |           |                                                                                       |                                                                                       |                               |                            |             |                 |                                   |       |
| <b>RMQ11702</b> |                                                                              |                        |                      |                       |                       |                   |                        |                      |                       |                       | phaA      |                                                                                       |                                                                                       | -0.1023                       | -0.3397                    | 0.069921    | -1.3274         | -1.8420                           | 372cn |
| Desc            | beta-ketothiolase, Acetyl-CoA acetyltransferase                              |                        |                      |                       |                       |                   |                        |                      |                       |                       |           |                                                                                       |                                                                                       |                               |                            |             |                 |                                   |       |
| <b>RMQ11763</b> |                                                                              |                        |                      |                       |                       |                   |                        |                      |                       |                       | pntA      |                                                                                       |                                                                                       | -0.7774                       | -2.5826                    | 0.000000    | -23.8968        | -11.4705                          | 213   |
| Desc            | NADP transhydrogenase subunit alpha (EC 1.6.1.2)                             |                        |                      |                       |                       |                   |                        |                      |                       |                       |           |                                                                                       |                                                                                       |                               |                            |             |                 |                                   |       |
| <b>MELorf17</b> |                                                                              |                        |                      |                       |                       |                   |                        |                      |                       |                       | orf17     |                                                                                       |                                                                                       | 0.0251                        | 0.0835                     | 0.507965    | -0.3881         |                                   | 451c  |
| Desc            | Cofactor biosynthesis, AF032114                                              |                        |                      |                       |                       |                   |                        |                      |                       |                       |           |                                                                                       |                                                                                       |                               |                            |             |                 |                                   |       |
| <b>RMQ15762</b> |                                                                              |                        |                      |                       |                       |                   |                        |                      |                       |                       | pqqA      |                                                                                       |                                                                                       | 0.4709                        | 1.5643                     | 0.000002    | -13.5676        | 4.5710                            | 19c   |
| Desc            | PQQ biosynthesis polypeptide, 29 amino acid peptide; putative, PQQ synthesis |                        |                      |                       |                       |                   |                        |                      |                       |                       |           |                                                                                       |                                                                                       |                               |                            |             |                 |                                   |       |
| <b>MELfdh2D</b> | 0.000000                                                                     | 5.670                  | 6.700                | 6.675                 | 1.000                 | 0.000107          | 11.120                 | 25.765               | 25.670                | 14.578                | fdh2D     |  |  | 0.6008                        | 1.9957                     | 0.000000    | -15.7819        | 8.8664                            | 61c   |
| Desc            | Molybdenum-dependent formate dehydrogenase                                   |                        |                      |                       |                       |                   |                        |                      |                       |                       | G         | G                                                                                     |                                                                                       |                               |                            |             |                 |                                   |       |

## Notes for supplemental Figures SF1-SF4

This type of figure has been referred to in our past work as a reconstructed array image and represents a computer generated global overview of the *Methylobacterium extorquens* AM1 proteomics dataset. Four such overviews are given. Unlike our previous work, there is no direct relationship implied between the physical order of the genes on their respective genetic elements and their presentation in the array images. The AM1 genome is made up of multiple genetic elements, and at this time it is not possible to illustrate with certainty in such a display which ORFs are associated with each physically distinct genetic element. Each image follows the same order as Summary Data Table S1, ascending RMQ number (2002 curation) from left to right, top to bottom, for all 7,556 entries in Table S1. The main value of the images is that they allow a quick overview of the dataset in terms of proteome coverage and the relative numbers of proteins called as changed using the two different quantitative approaches described in the paper. The color codes are the same as described in the notes for Tables S1-S3: **green**, more abundant in MeOH; **red**, more abundant in succinate; **yellow**, protein detected but without adequate statistical support for abundance change; **black**, no data for this ORF. For the proteomic data, black can mean several things: protein may have been present but was not detected, the ORF may have been annotated incorrectly, or that a protein encoding ORF exists but was not expressed under these conditions.

**Figure SF1.** All RMQ numbers shown according to the spectral counting results, including those that were detected qualitatively (yellow), but without adequate evidence for abundance change.

**Figure SF2.** All RMQ numbers showing only those with statistical support for abundance change (green and red only) by spectral counting.

**Figure SF3.** All RMQ numbers shown according to the summed signal intensity results, including those that were detected qualitatively (yellow), but without adequate evidence for abundance change.

**Figure SF4.** All RMQ numbers showing only those with statistical support for abundance change (green and red only) by summed signal intensity.

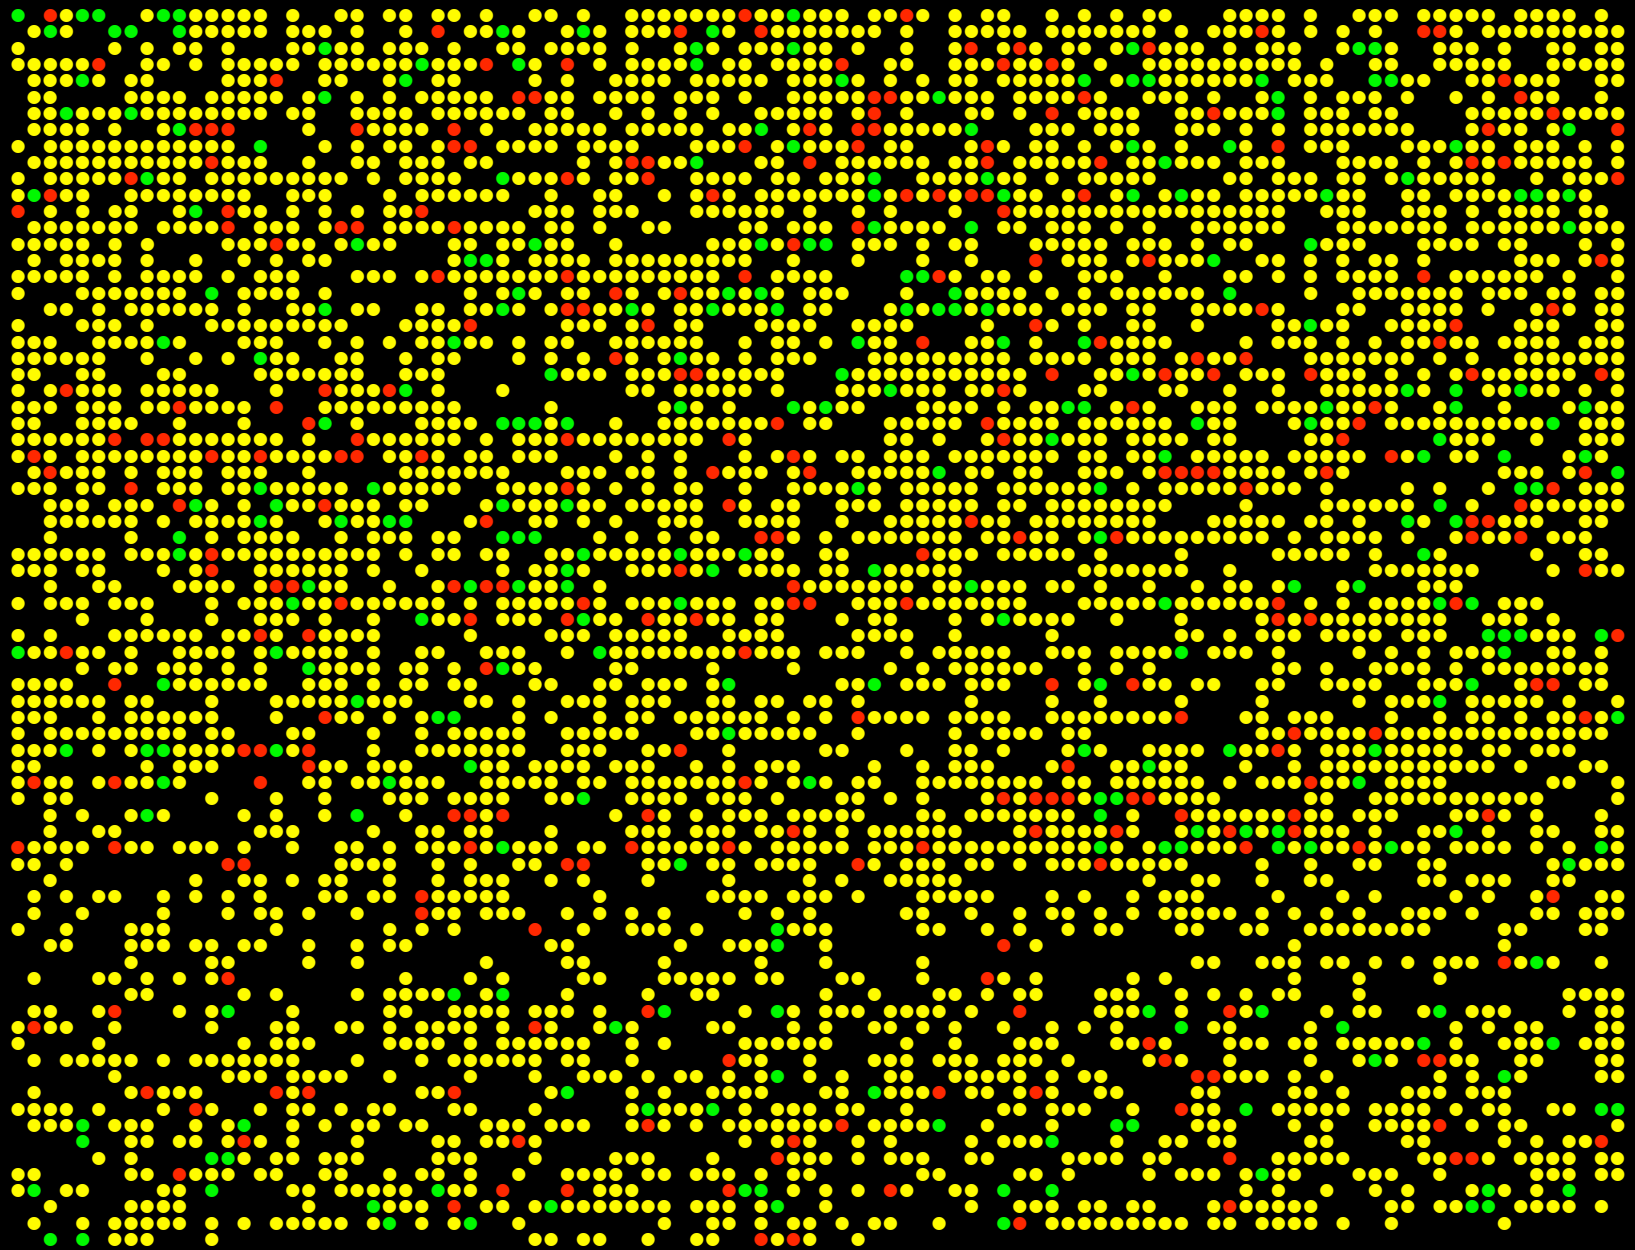

Global Spectral Counts  
Supplemental Figure SF1

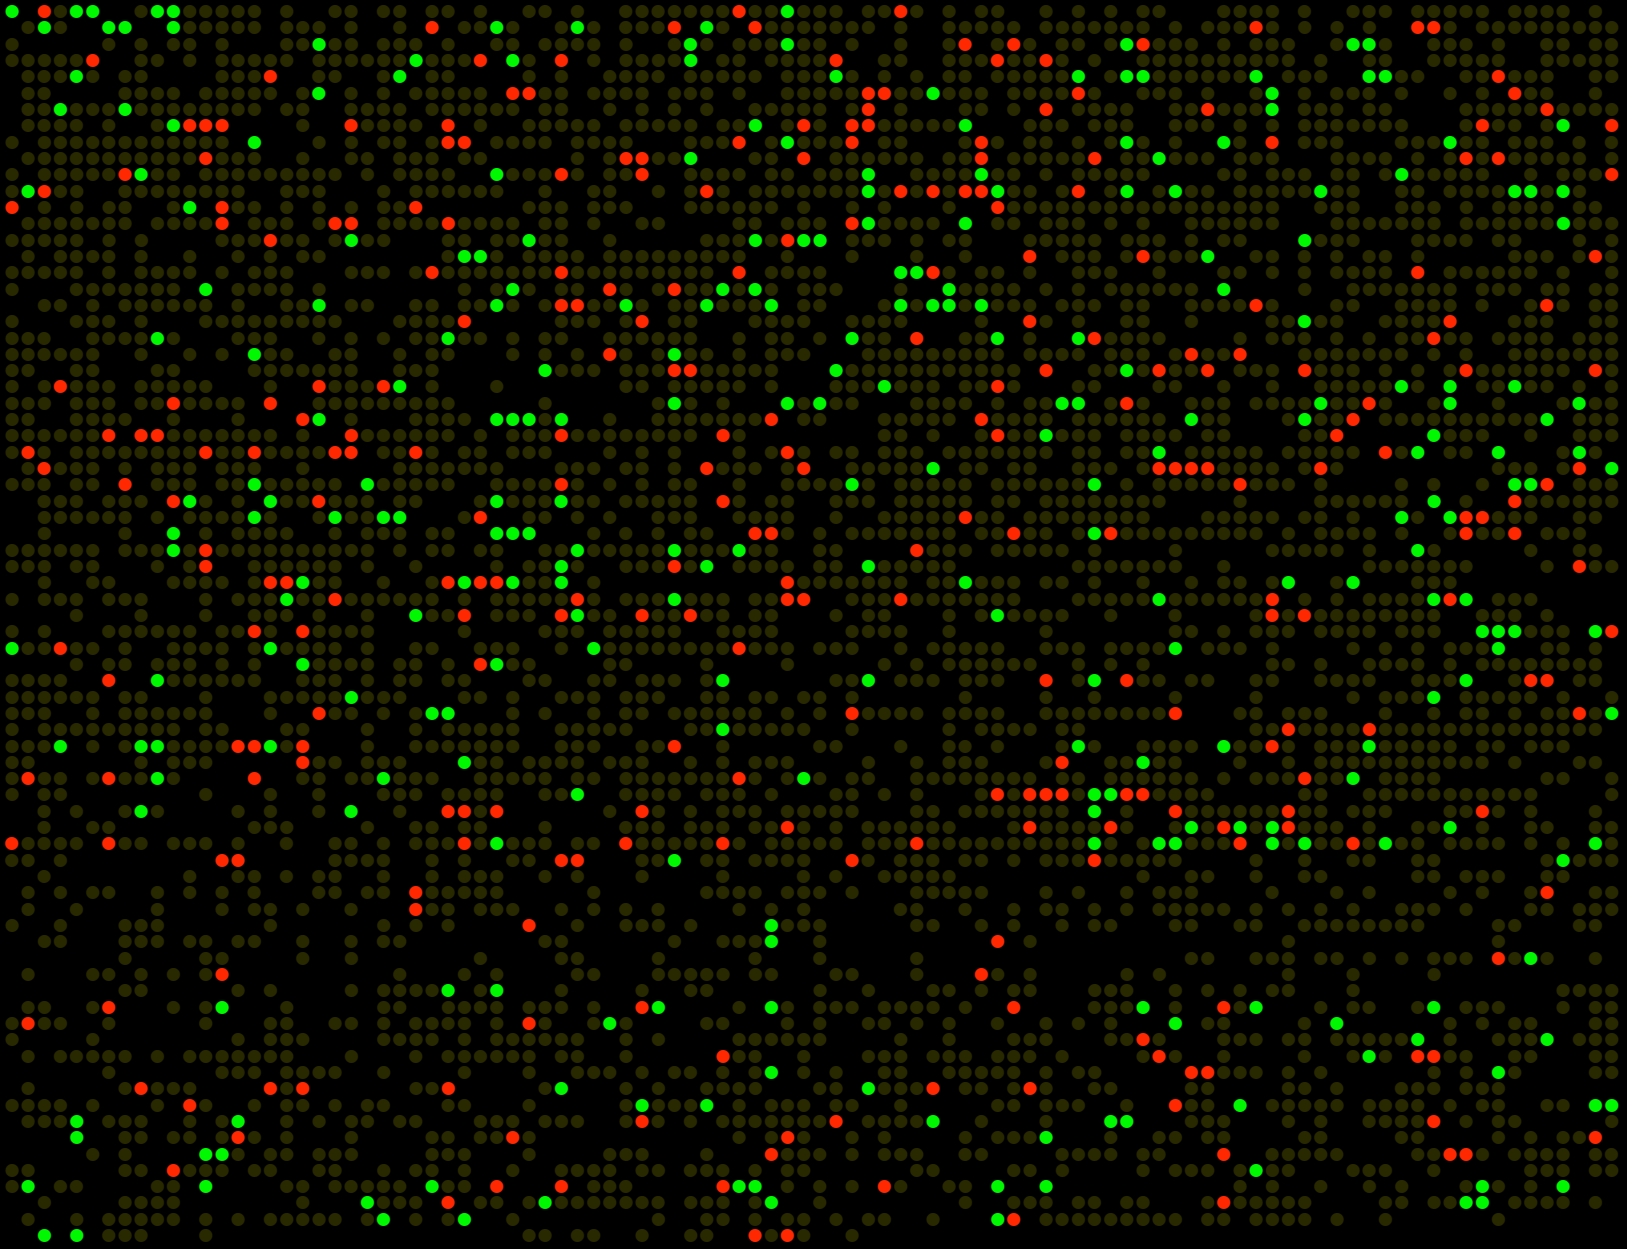

Global Spectral Counts

Supplemental Figure SF2

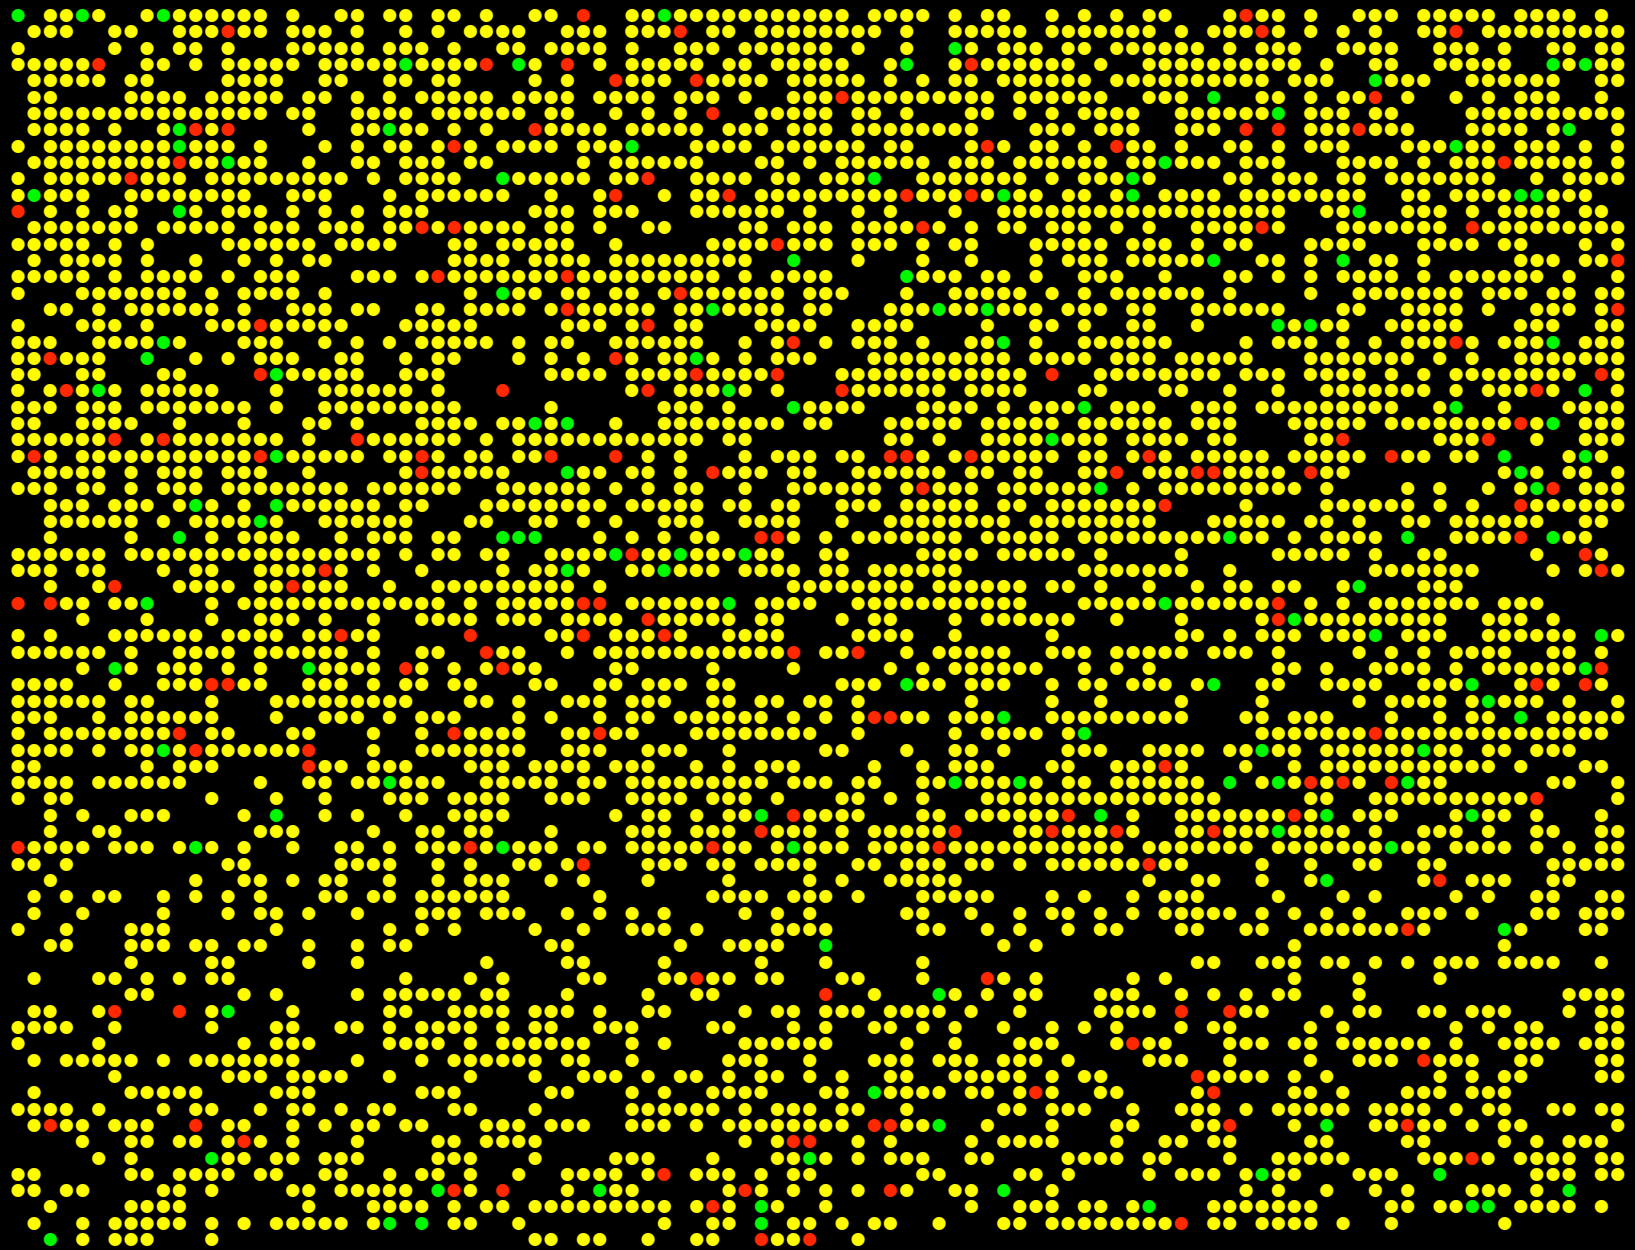

Global Intensity

Supplemental Figure SF3

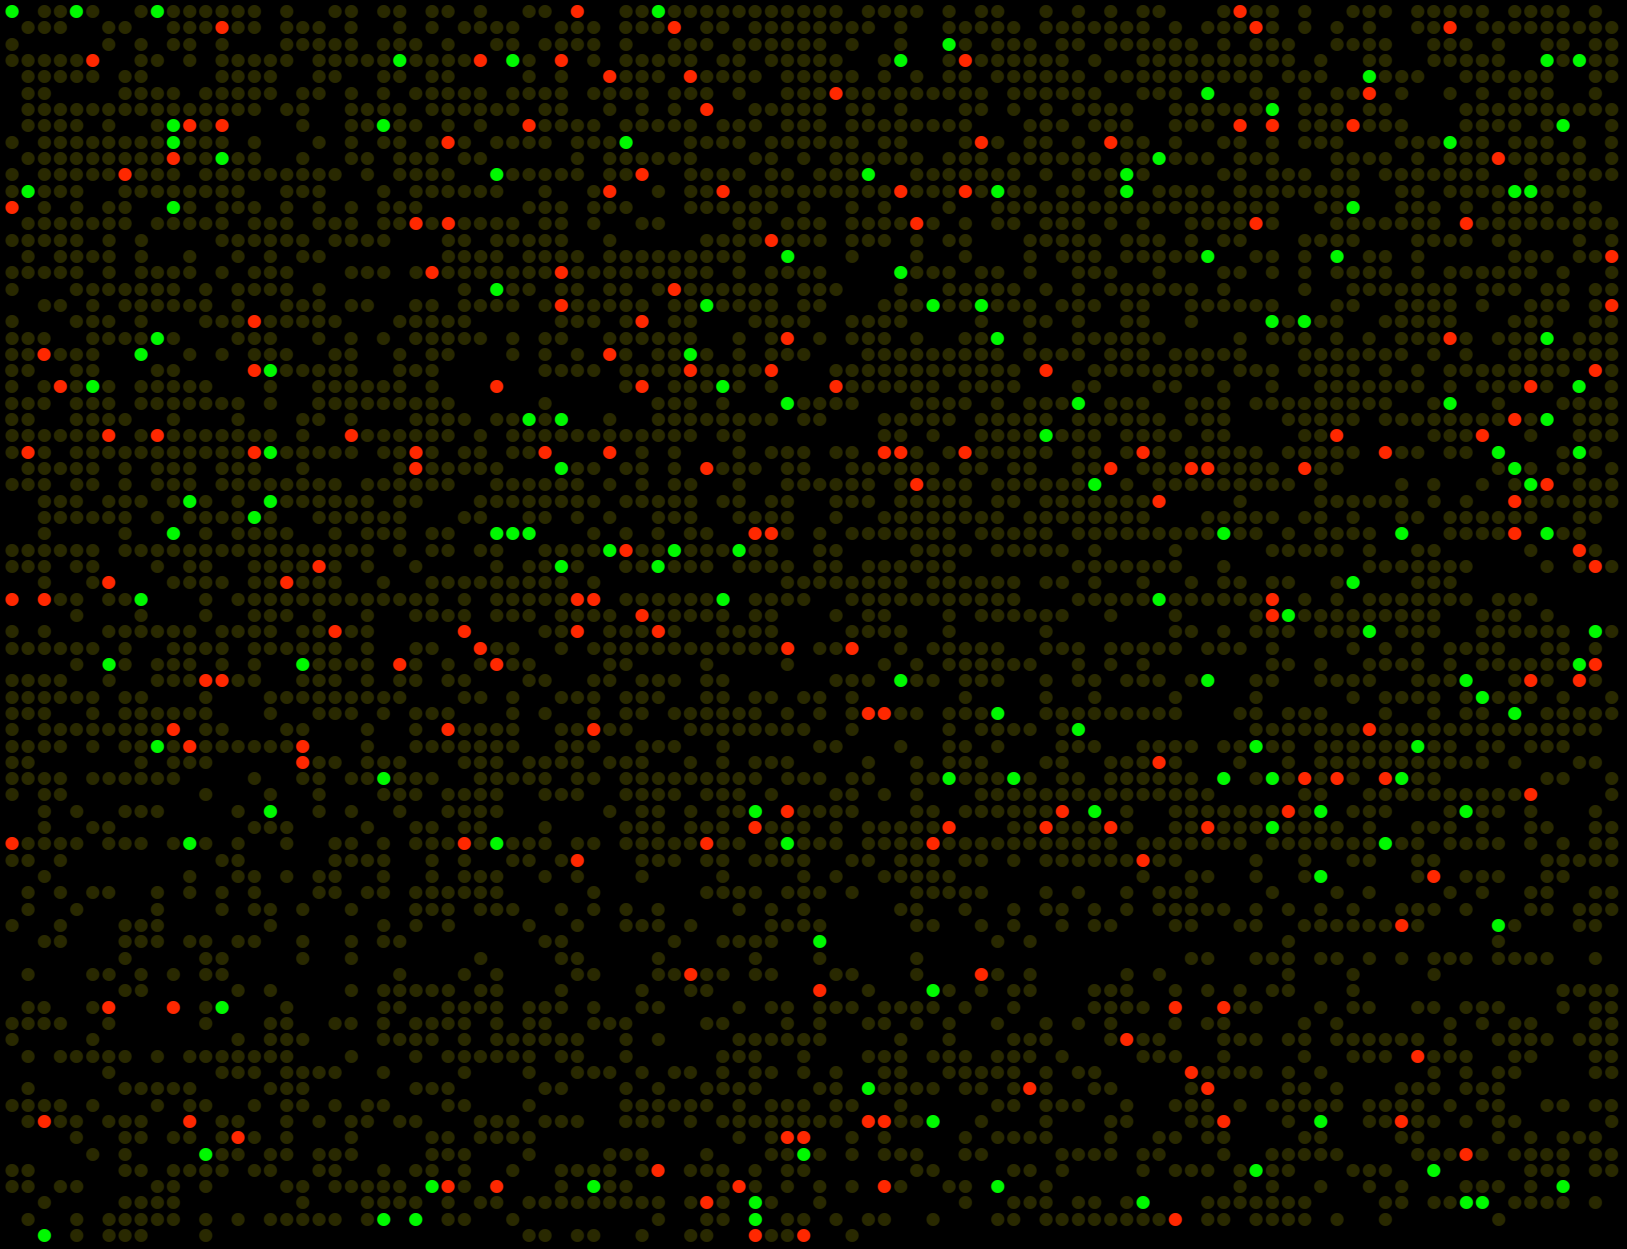

Global Intensity

Supplemental Figure SF4



## Misc. R source code used for the statistical analysis

### R code for the $G$ -test, calculation of $G_{Total}$ :

```
test = read.table(file.choose(), header =T)

Protein=test$Protein

G=test$TotalG

df=test$df

for (n in 1:length(Protein)){
  pvals[n] = 1 - pchisq(G[n],df=df[n]) ## calculates p-values
  n=n+1
}

install.packages("qvalue")

library(qvalue)
## install the q-value software (computer must be connected to the internet)

qobj = qvalue(pvals)
qobj$qvalue
## calculate the q-values

q=qobj$qvalue

x=data.frame(Protein, q)

write.table(x, file = "G:\\RMQ\\ScRatios\\TotalG\\ProSc.q.txt", append =F, quote=F, row.names=F, sep="\t")
```

## Normalization of the global data over all four comparisons for summed signal intensity:

Two sets of data from two biological replicates were collected for each growth condition. The sums of the signal intensities from *MeOH\_1*, *MeOH\_2*, *Succin\_1*, and *Succin\_2* were compared. *Succin\_1* was chosen as the reference dataset for normalization because it had the highest value of summed signal intensity among the four datasets. The signal intensities values for the remaining three datasets were thus normalized such that the sum values of signal intensities from all four datasets became equal. The implicit assumption behind such a calculation is that the total protein expressed under each condition is about the same, an assumption that was valid for this study. This step was carried out in R. Note that the variables were given different names in the R code, *mc2* = *MeOH\_1*, *mc3* = *MeOH\_2*, *sc1* = *Succin\_1*, *sc2* = *Succin\_2*.

```
test=read.table(file.choose(), header=T) #Read in the signal intensity data.

Protein=test$Protein

mc2=test$mc2
mc3=test$mc3
sc1=test$sc1
sc2=test$sc2
sum(mc2)
sum(mc3)
sum(sc1)
sum(sc2)

max(sum(mc2), sum(mc3), sum(sc1), sum(sc2)) #Check which dataset has the highest sum value.

mc2Norm=round(mc2*(sum(sc1)/sum(mc2)),0)
mc3Norm=round(mc3*(sum(sc1)/sum(mc3)),0)
sc1Norm=sc1
sc2Norm=round(sc2*(sum(sc1)/sum(sc2)),0)

x=data.frame(Protein, mc2, mc3, sc1, sc2, mc2Norm, mc3Norm, sc1Norm, sc2Norm)

write.table(x, file = "G:\\RMQ\\PiRatios\\Total.t.test.102907\\proPi_bf_af_Norm_Oct29_07.txt", append =F, quote=F, row.names=F,
sep="\t")
```

The  $p$ -values and  $q$ -values for global intensity were subsequently calculated in R as:

```
n=4
```

```
df=n-1
```

```
pvals=2*(1-pt(abs(t),df))
```

```
library(qvalue)
```

```
qobj = qvalue(pvals)
```

```
q=qobj$qvalue
```
